# Supplementary material for: Association of egg consumption, metabolic markers, and risk of cardiovascular diseases: A nested case-control study
Source: eLife. 2022 May 24;11:e72909. doi: 10.7554/eLife.72909 (PMC9129873; doi:10.7554/eLife.72909)
Supplement: Figure 1—source data 1. [file elife-72909-fig1-data1.xlsx]

## Sheet: Sheet3
beta	beta_lci	beta_uci	OR	OR_lci	OR_uci	description	sig_beta_p	sig_OR_p	is_summary
							Sig.	Sig.	T
						Mean Particle Diameter			T
0.0243921	0.0113583	0.0374259	0.896648	0.831777	0.966579	HDL	**	*
						Lipoprotein			T
0.0248307	0.0116066	0.0380548	0.961343	0.89303	1.03488	Very large HDL	**	-
0.0263304	0.0135922	0.0390686	0.883328	0.817952	0.953928	Large HDL	**	**
						Total Lipids			T
0.0246749	0.0114331	0.0379166	0.962197	0.893928	1.03568	Very large HDL	**	-
0.0263467	0.0135828	0.0391105	0.882332	0.817124	0.952743	Large HDL	**	**
						Total Cholesterol			T
0.0238966	0.0108654	0.0369277	0.911885	0.84604	0.982854	HDL	**	*
0.023455	0.0103843	0.0365257	0.897331	0.832618	0.967072	HDL2	**	*
0.0215587	0.00818882	0.0349286	1.00103	0.930802	1.07655	Very large HDL	*	-
0.0266776	0.0138514	0.0395038	0.877116	0.81247	0.946905	Large HDL	**	**
0.0225594	0.00934013	0.0357787	0.875737	0.811164	0.945449	Total cholesterol : total lipids in large HDL	*	**
-0.0191887	-0.0325439	-0.00583353	1.05776	0.976272	1.14604	Total cholesterol : total lipids in large LDL	*	-
-0.0192466	-0.0325497	-0.00594351	1.0319	0.958452	1.11097	Total cholesterol : total lipids in medium LDL	*	-
						Cholesterol Esters			T
-0.020141	-0.0331686	-0.00711349	1.1298	1.04851	1.21739	Small VLDL	*	**
0.0204547	0.00706157	0.0338479	1.01855	0.947279	1.09518	Very large HDL	*	-
0.0269831	0.0141951	0.039771	0.875402	0.810769	0.945187	Large HDL	**	**
0.0226965	0.00956134	0.0358316	0.87242	0.808299	0.941627	Cholesterol esters : total lipids in large HDL	*	**
						Free Cholesterol			T
0.0233503	0.0100751	0.0366255	0.96006	0.892179	1.03311	Very large HDL	**	-
0.024664	0.0116698	0.0376583	0.890187	0.824121	0.961549	Large HDL	**	*
						Phospholipids			T
0.0252467	0.0121002	0.0383932	0.927328	0.861063	0.998692	Very large HDL	**	-
0.0254053	0.0125956	0.038215	0.890167	0.824473	0.961095	Large HDL	**	*
-0.0201238	-0.0329861	-0.00726146	1.14038	1.0557	1.23184	Phospholipids : total lipds in large HDL	*	**
						Apolipoproteins			T
0.0192854	0.00636445	0.0322064	0.989341	0.917035	1.06735	ApoA1	*	-
-0.0231573	-0.036109	-0.0102056	1.18822	1.10199	1.28121	ApoB : ApoA1	**	***
						Ketone Bodies			T
0.0193839	0.00686839	0.0318994	0.97988	0.902443	1.06396	Acetate	*	-
