# Supplementary material for: Association of egg consumption, metabolic markers, and risk of cardiovascular diseases: A nested case-control study
Source: eLife. 2022 May 24;11:e72909. doi: 10.7554/eLife.72909 (PMC9129873; doi:10.7554/eLife.72909)
Supplement: Figure 2—source data 1. [file elife-72909-fig2-data1.xlsx]

## Sheet: Sheet 1
Coefficient (95% CI)	OR (95% CI) for CVD	OR (95% CI) for MI	OR (95% CI) for IS	OR (95% CI) for ICH
-0.005 (-0.018, 0.009)	1.086 (1.010, 1.167)	1.091 (0.991, 1.200)	1.099 (0.999, 1.208)	1.112 (1.018, 1.214)
0.008 (-0.005, 0.020)	0.885 (0.818, 0.956)	0.904 (0.817, 1.001)	0.894 (0.809, 0.989)	0.836 (0.757, 0.922)
0.024 (0.011, 0.037)	0.897 (0.832, 0.967)	0.854 (0.774, 0.943)	0.856 (0.777, 0.944)	0.914 (0.833, 1.003)
-0.011 (-0.024, 0.003)	1.069 (0.997, 1.147)	1.097 (0.993, 1.211)	1.102 (0.998, 1.215)	1.085 (0.997, 1.180)
-0.008 (-0.021, 0.006)	1.090 (1.015, 1.170)	1.113 (1.011, 1.226)	1.121 (1.019, 1.233)	1.116 (1.022, 1.218)
-0.010 (-0.024, 0.003)	1.118 (1.040, 1.201)	1.166 (1.058, 1.284)	1.174 (1.067, 1.292)	1.130 (1.035, 1.234)
-0.012 (-0.025, 0.002)	1.135 (1.056, 1.221)	1.187 (1.078, 1.308)	1.196 (1.088, 1.316)	1.148 (1.050, 1.255)
-0.016 (-0.029, -0.002)	1.155 (1.074, 1.243)	1.237 (1.122, 1.363)	1.246 (1.132, 1.371)	1.157 (1.056, 1.267)
-0.014 (-0.027, -0.001)	1.143 (1.061, 1.232)	1.247 (1.130, 1.376)	1.247 (1.132, 1.374)	1.128 (1.026, 1.239)
-0.011 (-0.024, 0.002)	1.102 (1.022, 1.188)	1.173 (1.062, 1.296)	1.169 (1.060, 1.289)	1.092 (0.994, 1.201)
-0.013 (-0.026, 0.000)	1.114 (1.034, 1.201)	1.181 (1.069, 1.304)	1.177 (1.067, 1.298)	1.108 (1.008, 1.217)
-0.015 (-0.028, -0.002)	1.129 (1.048, 1.216)	1.186 (1.074, 1.310)	1.183 (1.073, 1.304)	1.132 (1.030, 1.243)
-0.013 (-0.027, -0.000)	1.142 (1.059, 1.230)	1.197 (1.084, 1.322)	1.195 (1.084, 1.318)	1.153 (1.049, 1.268)
0.025 (0.012, 0.038)	0.961 (0.893, 1.035)	0.940 (0.853, 1.035)	0.940 (0.855, 1.034)	0.976 (0.892, 1.068)
0.026 (0.014, 0.039)	0.883 (0.818, 0.954)	0.838 (0.758, 0.926)	0.836 (0.758, 0.923)	0.908 (0.826, 0.997)
0.012 (-0.001, 0.025)	0.924 (0.856, 0.998)	0.873 (0.791, 0.963)	0.872 (0.791, 0.961)	0.988 (0.897, 1.088)
0.002 (-0.011, 0.014)	1.024 (0.949, 1.105)	1.022 (0.926, 1.127)	1.020 (0.926, 1.124)	1.068 (0.971, 1.175)
-0.011 (-0.024, 0.003)	1.070 (0.998, 1.148)	1.099 (0.995, 1.213)	1.103 (1.000, 1.217)	1.086 (0.998, 1.182)
-0.008 (-0.021, 0.006)	1.090 (1.015, 1.170)	1.113 (1.011, 1.226)	1.121 (1.019, 1.233)	1.116 (1.022, 1.218)
-0.010 (-0.024, 0.003)	1.116 (1.039, 1.199)	1.165 (1.057, 1.283)	1.173 (1.066, 1.291)	1.129 (1.034, 1.232)
-0.012 (-0.025, 0.002)	1.135 (1.056, 1.220)	1.188 (1.078, 1.308)	1.196 (1.088, 1.316)	1.147 (1.049, 1.254)
-0.016 (-0.029, -0.002)	1.157 (1.075, 1.244)	1.241 (1.126, 1.368)	1.250 (1.136, 1.376)	1.159 (1.057, 1.269)
-0.014 (-0.028, -0.001)	1.135 (1.053, 1.223)	1.235 (1.119, 1.363)	1.235 (1.120, 1.360)	1.119 (1.018, 1.229)
-0.011 (-0.024, 0.002)	1.096 (1.017, 1.182)	1.160 (1.050, 1.281)	1.156 (1.048, 1.275)	1.089 (0.991, 1.197)
-0.013 (-0.026, -0.000)	1.109 (1.029, 1.196)	1.171 (1.060, 1.293)	1.167 (1.058, 1.287)	1.104 (1.005, 1.213)
-0.015 (-0.028, -0.002)	1.126 (1.045, 1.213)	1.180 (1.069, 1.303)	1.177 (1.068, 1.298)	1.129 (1.028, 1.241)
-0.014 (-0.027, -0.001)	1.136 (1.054, 1.224)	1.189 (1.077, 1.313)	1.187 (1.077, 1.308)	1.146 (1.043, 1.260)
0.025 (0.011, 0.038)	0.962 (0.894, 1.036)	0.941 (0.855, 1.036)	0.942 (0.856, 1.035)	0.978 (0.893, 1.070)
0.026 (0.014, 0.039)	0.882 (0.817, 0.953)	0.836 (0.756, 0.924)	0.835 (0.756, 0.921)	0.907 (0.826, 0.996)
0.012 (-0.001, 0.025)	0.922 (0.853, 0.995)	0.868 (0.787, 0.958)	0.867 (0.787, 0.956)	0.987 (0.896, 1.086)
0.002 (-0.011, 0.014)	1.020 (0.945, 1.100)	1.017 (0.922, 1.121)	1.015 (0.922, 1.119)	1.063 (0.966, 1.169)
-0.005 (-0.018, 0.008)	1.108 (1.028, 1.195)	1.156 (1.048, 1.275)	1.154 (1.048, 1.271)	1.127 (1.025, 1.239)
-0.014 (-0.027, -0.001)	1.152 (1.069, 1.242)	1.227 (1.113, 1.352)	1.228 (1.115, 1.354)	1.169 (1.063, 1.286)
-0.014 (-0.027, -0.000)	1.151 (1.070, 1.239)	1.108 (1.003, 1.225)	1.231 (1.119, 1.355)	1.167 (1.064, 1.280)
-0.012 (-0.025, 0.002)	1.072 (0.999, 1.150)	1.091 (0.990, 1.203)	1.113 (1.008, 1.229)	1.081 (0.994, 1.176)
-0.008 (-0.022, 0.005)	1.071 (0.998, 1.149)	1.151 (1.043, 1.270)	1.097 (0.997, 1.208)	1.096 (1.005, 1.196)
-0.011 (-0.024, 0.003)	1.095 (1.020, 1.175)	1.183 (1.073, 1.303)	1.157 (1.050, 1.275)	1.104 (1.013, 1.204)
-0.012 (-0.025, 0.002)	1.122 (1.044, 1.206)	1.247 (1.130, 1.375)	1.189 (1.081, 1.309)	1.131 (1.035, 1.236)
-0.018 (-0.031, -0.005)	1.151 (1.069, 1.239)	1.179 (1.067, 1.304)	1.250 (1.135, 1.377)	1.152 (1.049, 1.266)
-0.015 (-0.028, -0.002)	1.096 (1.017, 1.182)	1.132 (1.025, 1.251)	1.176 (1.065, 1.298)	1.080 (0.983, 1.187)
-0.012 (-0.025, 0.002)	1.084 (1.006, 1.169)	1.146 (1.036, 1.268)	1.128 (1.023, 1.245)	1.083 (0.986, 1.190)
-0.017 (-0.030, -0.004)	1.110 (1.028, 1.198)	1.148 (1.038, 1.269)	1.144 (1.036, 1.263)	1.120 (1.016, 1.234)
-0.015 (-0.028, -0.002)	1.102 (1.022, 1.189)	1.135 (1.029, 1.252)	1.145 (1.037, 1.264)	1.102 (1.002, 1.212)
-0.017 (-0.030, -0.004)	1.100 (1.022, 1.184)	1.130 (1.024, 1.246)	1.133 (1.029, 1.248)	1.109 (1.010, 1.218)
-0.016 (-0.029, -0.003)	1.099 (1.021, 1.183)	0.863 (0.784, 0.951)	1.128 (1.025, 1.242)	1.110 (1.011, 1.219)
0.024 (0.011, 0.037)	0.912 (0.846, 0.983)	0.841 (0.765, 0.926)	0.864 (0.785, 0.950)	0.956 (0.871, 1.050)
0.023 (0.010, 0.037)	0.897 (0.833, 0.967)	1.099 (0.998, 1.211)	0.842 (0.766, 0.925)	0.948 (0.863, 1.041)
0.017 (0.004, 0.030)	1.061 (0.984, 1.144)	0.993 (0.903, 1.092)	1.098 (0.997, 1.208)	1.067 (0.973, 1.171)
0.022 (0.008, 0.035)	1.001 (0.931, 1.077)	0.826 (0.748, 0.912)	0.995 (0.906, 1.092)	1.019 (0.931, 1.114)
0.027 (0.014, 0.040)	0.877 (0.812, 0.947)	0.849 (0.772, 0.935)	0.825 (0.748, 0.910)	0.903 (0.822, 0.992)
0.009 (-0.004, 0.022)	0.915 (0.847, 0.988)	1.039 (0.943, 1.145)	0.848 (0.771, 0.933)	0.989 (0.899, 1.088)
-0.004 (-0.017, 0.009)	1.032 (0.959, 1.111)	1.228 (1.113, 1.356)	1.040 (0.945, 1.145)	1.041 (0.951, 1.139)
0.005 (-0.008, 0.019)	0.985 (0.899, 1.079)	0.972 (0.897, 1.052)	0.971 (0.897, 1.052)	0.995 (0.841, 1.178)
-0.013 (-0.026, 0.001)	1.071 (0.999, 1.150)	1.110 (1.005, 1.227)	1.114 (1.009, 1.229)	1.080 (0.992, 1.175)
-0.009 (-0.023, 0.004)	1.062 (0.989, 1.139)	1.082 (0.982, 1.193)	1.088 (0.989, 1.198)	1.084 (0.994, 1.182)
-0.012 (-0.026, 0.002)	1.064 (0.993, 1.140)	1.133 (1.022, 1.257)	1.135 (1.025, 1.257)	1.063 (0.979, 1.155)
-0.013 (-0.026, 0.001)	1.105 (1.028, 1.188)	1.164 (1.056, 1.284)	1.169 (1.061, 1.287)	1.114 (1.019, 1.219)
-0.020 (-0.033, -0.007)	1.130 (1.049, 1.217)	1.211 (1.097, 1.338)	1.212 (1.100, 1.337)	1.133 (1.030, 1.246)
-0.015 (-0.028, -0.002)	1.090 (1.011, 1.176)	1.166 (1.054, 1.289)	1.161 (1.051, 1.282)	1.078 (0.980, 1.186)
-0.012 (-0.025, 0.001)	1.097 (1.018, 1.183)	1.150 (1.041, 1.271)	1.145 (1.038, 1.264)	1.101 (1.002, 1.210)
-0.017 (-0.030, -0.004)	1.121 (1.035, 1.214)	1.176 (1.051, 1.316)	1.173 (1.051, 1.309)	1.116 (1.008, 1.235)
-0.019 (-0.032, -0.005)	1.073 (0.997, 1.155)	1.082 (0.982, 1.193)	1.084 (0.985, 1.193)	1.089 (0.990, 1.197)
-0.017 (-0.030, -0.004)	1.065 (0.990, 1.146)	1.069 (0.971, 1.176)	1.071 (0.975, 1.177)	1.081 (0.983, 1.189)
0.020 (0.007, 0.034)	1.019 (0.947, 1.095)	1.015 (0.923, 1.115)	1.017 (0.926, 1.116)	1.036 (0.947, 1.133)
0.027 (0.014, 0.040)	0.875 (0.811, 0.945)	0.823 (0.745, 0.910)	0.823 (0.746, 0.908)	0.902 (0.821, 0.991)
0.008 (-0.005, 0.021)	0.916 (0.848, 0.990)	0.848 (0.770, 0.933)	0.847 (0.770, 0.931)	0.993 (0.903, 1.092)
-0.004 (-0.017, 0.010)	1.026 (0.953, 1.105)	1.021 (0.922, 1.131)	1.024 (0.924, 1.134)	1.029 (0.941, 1.126)
-0.014 (-0.027, -0.001)	1.105 (1.026, 1.191)	1.110 (1.009, 1.222)	1.117 (1.017, 1.227)	1.160 (1.053, 1.278)
-0.012 (-0.026, 0.002)	1.069 (0.997, 1.147)	1.087 (0.985, 1.199)	1.093 (0.992, 1.205)	1.089 (1.001, 1.186)
-0.007 (-0.021, 0.006)	1.064 (0.992, 1.142)	1.072 (0.973, 1.181)	1.077 (0.979, 1.186)	1.097 (1.007, 1.196)
-0.011 (-0.025, 0.002)	1.099 (1.024, 1.179)	1.147 (1.039, 1.266)	1.156 (1.048, 1.274)	1.111 (1.020, 1.210)
-0.012 (-0.025, 0.002)	1.131 (1.053, 1.216)	1.189 (1.079, 1.310)	1.199 (1.089, 1.319)	1.139 (1.043, 1.244)
-0.014 (-0.027, -0.000)	1.154 (1.073, 1.242)	1.250 (1.134, 1.377)	1.259 (1.144, 1.385)	1.152 (1.051, 1.262)
-0.013 (-0.026, 0.000)	1.099 (1.021, 1.184)	1.192 (1.076, 1.320)	1.193 (1.079, 1.320)	1.073 (0.979, 1.175)
-0.011 (-0.025, 0.002)	1.050 (0.974, 1.131)	1.082 (0.980, 1.195)	1.081 (0.980, 1.192)	1.039 (0.947, 1.139)
-0.012 (-0.026, 0.001)	1.070 (0.993, 1.153)	1.112 (1.007, 1.228)	1.109 (1.005, 1.222)	1.059 (0.965, 1.163)
-0.011 (-0.024, 0.002)	1.119 (1.038, 1.206)	1.178 (1.068, 1.301)	1.175 (1.066, 1.295)	1.119 (1.018, 1.230)
-0.011 (-0.024, 0.002)	1.124 (1.043, 1.211)	1.183 (1.072, 1.306)	1.181 (1.072, 1.301)	1.130 (1.028, 1.242)
0.023 (0.010, 0.037)	0.960 (0.892, 1.033)	0.942 (0.857, 1.036)	0.943 (0.859, 1.036)	0.978 (0.893, 1.070)
0.025 (0.012, 0.038)	0.890 (0.824, 0.962)	0.846 (0.767, 0.934)	0.844 (0.766, 0.931)	0.914 (0.833, 1.003)
0.012 (-0.001, 0.025)	0.914 (0.847, 0.987)	0.864 (0.784, 0.952)	0.862 (0.784, 0.949)	0.973 (0.885, 1.071)
0.008 (-0.005, 0.021)	0.972 (0.901, 1.050)	0.954 (0.865, 1.053)	0.953 (0.865, 1.050)	1.021 (0.927, 1.125)
-0.009 (-0.022, 0.005)	1.141 (1.061, 1.227)	1.201 (1.091, 1.322)	1.210 (1.101, 1.331)	1.147 (1.049, 1.253)
-0.011 (-0.024, 0.002)	1.135 (1.056, 1.221)	1.184 (1.075, 1.303)	1.193 (1.085, 1.312)	1.150 (1.051, 1.257)
-0.011 (-0.025, 0.002)	1.061 (0.990, 1.138)	1.089 (0.986, 1.204)	1.093 (0.991, 1.207)	1.072 (0.987, 1.166)
-0.008 (-0.021, 0.006)	1.089 (1.014, 1.170)	1.112 (1.010, 1.224)	1.120 (1.018, 1.232)	1.116 (1.022, 1.218)
-0.010 (-0.024, 0.003)	1.121 (1.044, 1.205)	1.167 (1.060, 1.285)	1.176 (1.069, 1.294)	1.135 (1.039, 1.239)
-0.012 (-0.025, 0.001)	1.138 (1.058, 1.223)	1.186 (1.077, 1.306)	1.195 (1.087, 1.315)	1.150 (1.052, 1.257)
-0.015 (-0.029, -0.002)	1.146 (1.066, 1.233)	1.214 (1.102, 1.338)	1.226 (1.114, 1.349)	1.144 (1.046, 1.251)
-0.011 (-0.024, 0.002)	1.147 (1.066, 1.235)	1.249 (1.133, 1.375)	1.258 (1.144, 1.384)	1.124 (1.026, 1.230)
-0.004 (-0.017, 0.009)	1.141 (1.058, 1.230)	1.272 (1.153, 1.404)	1.275 (1.158, 1.405)	1.081 (0.986, 1.185)
-0.000 (-0.014, 0.013)	1.141 (1.058, 1.230)	1.270 (1.150, 1.402)	1.273 (1.155, 1.403)	1.091 (0.995, 1.196)
-0.002 (-0.015, 0.011)	1.135 (1.051, 1.225)	1.274 (1.152, 1.409)	1.276 (1.156, 1.409)	1.070 (0.975, 1.174)
-0.003 (-0.016, 0.011)	1.152 (1.069, 1.241)	1.255 (1.137, 1.385)	1.261 (1.144, 1.389)	1.108 (1.010, 1.215)
-0.006 (-0.020, 0.007)	1.179 (1.095, 1.269)	1.266 (1.149, 1.396)	1.274 (1.157, 1.403)	1.168 (1.065, 1.280)
0.006 (-0.007, 0.019)	1.057 (0.981, 1.139)	1.118 (1.012, 1.234)	1.120 (1.016, 1.235)	1.042 (0.951, 1.141)
0.007 (-0.006, 0.020)	1.068 (0.991, 1.151)	1.125 (1.017, 1.246)	1.129 (1.021, 1.249)	1.051 (0.960, 1.151)
0.014 (0.002, 0.027)	0.974 (0.899, 1.055)	1.014 (0.909, 1.132)	1.013 (0.909, 1.128)	0.939 (0.855, 1.032)
-0.003 (-0.016, 0.011)	1.045 (0.971, 1.123)	1.079 (0.981, 1.188)	1.082 (0.984, 1.189)	1.058 (0.967, 1.158)
-0.004 (-0.018, 0.009)	1.101 (1.024, 1.184)	1.169 (1.062, 1.287)	1.174 (1.068, 1.291)	1.085 (0.992, 1.186)
-0.016 (-0.029, -0.003)	1.052 (0.977, 1.132)	1.089 (0.987, 1.201)	1.047 (0.954, 1.149)	1.099 (0.997, 1.211)
-0.003 (-0.016, 0.010)	1.094 (1.017, 1.178)	1.082 (0.981, 1.192)	1.098 (1.000, 1.206)	1.158 (1.052, 1.275)
-0.004 (-0.017, 0.010)	1.089 (1.011, 1.172)	1.168 (1.059, 1.287)	1.083 (0.987, 1.189)	1.156 (1.049, 1.274)
-0.001 (-0.014, 0.013)	1.062 (0.987, 1.142)	1.191 (1.082, 1.312)	1.056 (0.964, 1.158)	1.122 (1.019, 1.236)
-0.012 (-0.025, 0.002)	1.067 (0.995, 1.145)	1.227 (1.113, 1.351)	1.094 (0.992, 1.206)	1.090 (1.001, 1.186)
-0.008 (-0.021, 0.006)	1.066 (0.994, 1.144)	1.181 (1.068, 1.306)	1.088 (0.988, 1.198)	1.095 (1.004, 1.194)
-0.011 (-0.024, 0.003)	1.116 (1.039, 1.198)	1.134 (1.027, 1.251)	1.176 (1.068, 1.295)	1.128 (1.033, 1.231)
-0.012 (-0.026, 0.001)	1.136 (1.057, 1.221)	1.174 (1.063, 1.296)	1.200 (1.091, 1.320)	1.148 (1.050, 1.255)
-0.014 (-0.027, -0.001)	1.142 (1.062, 1.229)	1.223 (1.107, 1.350)	1.236 (1.123, 1.360)	1.144 (1.044, 1.253)
-0.013 (-0.026, 0.000)	1.108 (1.029, 1.195)	1.216 (1.101, 1.342)	1.181 (1.070, 1.304)	1.095 (0.997, 1.202)
-0.011 (-0.024, 0.002)	1.078 (1.001, 1.162)	0.892 (0.810, 0.982)	1.130 (1.025, 1.245)	1.067 (0.972, 1.172)
-0.012 (-0.025, 0.001)	1.113 (1.032, 1.200)	0.845 (0.765, 0.934)	1.169 (1.061, 1.289)	1.113 (1.012, 1.223)
-0.012 (-0.025, 0.001)	1.156 (1.072, 1.247)	0.885 (0.801, 0.978)	1.220 (1.106, 1.345)	1.166 (1.059, 1.284)
-0.008 (-0.021, 0.005)	1.155 (1.070, 1.246)	0.950 (0.861, 1.047)	1.214 (1.102, 1.339)	1.176 (1.067, 1.295)
0.025 (0.012, 0.038)	0.927 (0.861, 0.999)	0.965 (0.875, 1.064)	0.892 (0.811, 0.981)	0.943 (0.861, 1.033)
0.025 (0.013, 0.038)	0.890 (0.824, 0.961)	1.260 (1.142, 1.390)	0.844 (0.765, 0.931)	0.918 (0.836, 1.008)
0.015 (0.002, 0.027)	0.926 (0.857, 1.000)	1.274 (1.154, 1.406)	0.883 (0.801, 0.974)	0.978 (0.888, 1.077)
0.006 (-0.007, 0.019)	0.977 (0.906, 1.054)	1.151 (1.046, 1.266)	0.948 (0.860, 1.043)	1.028 (0.935, 1.130)
0.019 (0.006, 0.032)	0.989 (0.917, 1.067)	1.132 (1.030, 1.244)	0.967 (0.878, 1.065)	1.039 (0.945, 1.143)
-0.015 (-0.028, -0.002)	1.186 (1.100, 1.279)	1.178 (1.071, 1.296)	1.261 (1.145, 1.389)	1.209 (1.099, 1.332)
-0.023 (-0.036, -0.010)	1.188 (1.102, 1.281)	1.119 (1.015, 1.233)	1.276 (1.158, 1.406)	1.183 (1.075, 1.303)
-0.008 (-0.022, 0.005)	1.151 (1.069, 1.240)	1.170 (1.060, 1.292)	1.161 (1.057, 1.276)	1.234 (1.121, 1.358)
-0.009 (-0.022, 0.004)	1.131 (1.051, 1.217)	1.213 (1.102, 1.335)	1.143 (1.042, 1.254)	1.202 (1.094, 1.322)
-0.007 (-0.020, 0.006)	1.149 (1.067, 1.236)	1.104 (1.002, 1.216)	1.188 (1.082, 1.305)	1.195 (1.089, 1.313)
-0.009 (-0.022, 0.004)	1.156 (1.071, 1.248)	0.942 (0.855, 1.037)	1.129 (1.026, 1.242)	1.286 (1.162, 1.425)
-0.006 (-0.018, 0.007)	1.143 (1.058, 1.235)	0.911 (0.829, 1.002)	1.165 (1.058, 1.283)	1.208 (1.093, 1.334)
-0.007 (-0.020, 0.005)	1.152 (1.067, 1.243)	1.152 (1.046, 1.269)	1.204 (1.096, 1.322)	1.173 (1.063, 1.294)
-0.009 (-0.022, 0.004)	1.152 (1.067, 1.243)	0.932 (0.846, 1.027)	1.116 (1.015, 1.227)	1.289 (1.163, 1.428)
-0.010 (-0.023, 0.004)	0.991 (0.910, 1.079)	1.072 (0.972, 1.182)	0.950 (0.866, 1.043)	1.153 (0.952, 1.396)
0.005 (-0.008, 0.018)	0.911 (0.843, 0.984)	1.064 (0.973, 1.165)	0.908 (0.826, 0.998)	0.877 (0.799, 0.962)
0.003 (-0.010, 0.016)	1.062 (0.986, 1.144)	0.922 (0.839, 1.014)	1.154 (1.049, 1.270)	1.007 (0.918, 1.105)
0.000 (-0.013, 0.013)	1.010 (0.937, 1.088)	0.933 (0.853, 1.020)	0.934 (0.848, 1.028)	1.059 (0.965, 1.163)
0.003 (-0.009, 0.015)	1.033 (0.956, 1.116)	1.006 (0.914, 1.108)	1.054 (0.957, 1.160)	1.022 (0.927, 1.128)
0.004 (-0.010, 0.017)	0.997 (0.929, 1.071)	0.899 (0.815, 0.993)	1.049 (0.960, 1.147)	0.935 (0.856, 1.021)
0.001 (-0.012, 0.014)	1.005 (0.934, 1.080)	0.977 (0.889, 1.075)	0.927 (0.844, 1.018)	1.048 (0.958, 1.146)
0.000 (-0.014, 0.014)	0.973 (0.903, 1.049)	1.018 (0.922, 1.123)	0.936 (0.856, 1.024)	0.984 (0.900, 1.077)
-0.010 (-0.024, 0.003)	1.003 (0.933, 1.078)	1.026 (0.927, 1.137)	1.014 (0.922, 1.116)	1.022 (0.937, 1.115)
-0.017 (-0.030, -0.004)	0.918 (0.850, 0.991)	1.068 (0.965, 1.182)	0.905 (0.820, 0.998)	0.967 (0.880, 1.062)
-0.009 (-0.023, 0.004)	0.988 (0.920, 1.062)	0.976 (0.884, 1.078)	0.978 (0.890, 1.075)	1.032 (0.947, 1.126)
0.008 (-0.005, 0.021)	1.015 (0.942, 1.093)	0.997 (0.901, 1.102)	1.018 (0.923, 1.122)	1.042 (0.952, 1.141)
-0.000 (-0.013, 0.012)	1.013 (0.938, 1.094)	0.959 (0.870, 1.057)	1.031 (0.932, 1.141)	1.036 (0.943, 1.139)
0.018 (0.005, 0.030)	0.995 (0.921, 1.076)	1.321 (1.196, 1.459)	1.065 (0.963, 1.177)	0.947 (0.861, 1.042)
0.018 (0.004, 0.031)	0.994 (0.922, 1.071)	1.087 (0.983, 1.202)	0.971 (0.880, 1.071)	0.989 (0.902, 1.084)
0.002 (-0.011, 0.015)	1.002 (0.928, 1.081)	1.334 (1.205, 1.477)	0.994 (0.900, 1.098)	1.031 (0.940, 1.131)
0.014 (0.000, 0.027)	0.943 (0.874, 1.016)	0.936 (0.846, 1.035)	0.964 (0.875, 1.061)	0.917 (0.836, 1.007)
-0.005 (-0.018, 0.009)	1.236 (1.143, 1.336)	1.047 (0.945, 1.161)	1.320 (1.197, 1.456)	1.198 (1.085, 1.323)
0.001 (-0.012, 0.013)	1.055 (0.979, 1.138)	1.214 (1.085, 1.358)	1.091 (0.987, 1.205)	1.005 (0.917, 1.101)
-0.008 (-0.021, 0.005)	1.274 (1.179, 1.377)	1.030 (0.932, 1.137)	1.343 (1.215, 1.486)	1.289 (1.173, 1.418)
0.010 (-0.003, 0.023)	1.053 (0.978, 1.134)	1.103 (0.998, 1.219)	0.936 (0.848, 1.033)	1.245 (1.128, 1.374)
0.019 (0.007, 0.032)	0.980 (0.902, 1.064)	0.808 (0.734, 0.890)	1.021 (0.922, 1.131)	0.958 (0.863, 1.064)
-0.002 (-0.015, 0.010)	1.162 (1.069, 1.263)	1.152 (0.972, 1.365)	1.214 (1.088, 1.356)	1.140 (1.031, 1.260)
-0.011 (-0.024, 0.002)	1.060 (0.983, 1.143)	1.035 (0.936, 1.143)	1.025 (0.929, 1.131)	1.120 (1.020, 1.229)
-0.015 (-0.028, -0.001)	1.054 (0.982, 1.131)	0.851 (0.771, 0.940)	1.104 (1.000, 1.218)	1.045 (0.961, 1.137)
0.023 (0.010, 0.036)	0.872 (0.808, 0.942)	1.017 (0.926, 1.117)	0.809 (0.736, 0.889)	0.903 (0.822, 0.992)
-0.018 (-0.031, -0.004)	1.114 (1.006, 1.233)	0.957 (0.865, 1.059)	1.152 (0.977, 1.359)	1.112 (0.972, 1.273)
-0.009 (-0.023, 0.004)	0.994 (0.928, 1.064)	1.017 (0.918, 1.127)	1.029 (0.934, 1.134)	0.987 (0.913, 1.068)
-0.007 (-0.020, 0.006)	0.941 (0.868, 1.020)	1.012 (0.922, 1.111)	0.851 (0.772, 0.939)	1.010 (0.922, 1.107)
-0.018 (-0.032, -0.005)	1.034 (0.960, 1.113)	0.998 (0.904, 1.100)	1.021 (0.931, 1.120)	1.052 (0.957, 1.156)
-0.003 (-0.016, 0.010)	0.942 (0.872, 1.017)	1.249 (1.131, 1.380)	0.948 (0.858, 1.047)	0.931 (0.846, 1.024)
-0.004 (-0.018, 0.009)	1.022 (0.949, 1.101)	0.990 (0.900, 1.088)	1.020 (0.921, 1.130)	1.013 (0.926, 1.110)
-0.016 (-0.029, -0.002)	1.026 (0.953, 1.105)	0.898 (0.815, 0.990)	1.016 (0.927, 1.113)	1.040 (0.947, 1.142)
-0.011 (-0.024, 0.003)	0.987 (0.916, 1.064)	0.949 (0.857, 1.051)	0.991 (0.900, 1.092)	0.978 (0.892, 1.072)
-0.017 (-0.029, -0.004)	1.186 (1.098, 1.282)	1.069 (0.968, 1.181)	1.254 (1.136, 1.384)	1.192 (1.083, 1.312)
-0.008 (-0.021, 0.006)	0.991 (0.923, 1.063)	0.901 (0.816, 0.995)	0.992 (0.903, 1.089)	1.004 (0.922, 1.093)
-0.005 (-0.018, 0.008)	0.923 (0.855, 0.997)	0.846 (0.765, 0.935)	0.886 (0.804, 0.976)	0.931 (0.847, 1.024)
-0.008 (-0.021, 0.006)	0.968 (0.892, 1.049)	1.100 (0.993, 1.218)	0.949 (0.857, 1.051)	0.967 (0.880, 1.063)
-0.015 (-0.028, -0.001)	1.054 (0.983, 1.130)	0.876 (0.796, 0.963)	1.076 (0.976, 1.187)	1.065 (0.980, 1.157)
0.015 (0.001, 0.028)	0.933 (0.860, 1.013)	0.876 (0.794, 0.967)	0.897 (0.813, 0.990)	0.950 (0.865, 1.043)
0.000 (-0.013, 0.014)	0.879 (0.811, 0.954)	1.179 (1.063, 1.308)	0.843 (0.762, 0.932)	0.870 (0.789, 0.959)
-0.011 (-0.025, 0.002)	1.062 (0.991, 1.138)	0.883 (0.799, 0.976)	1.108 (1.002, 1.224)	1.073 (0.988, 1.164)
0.010 (-0.003, 0.023)	0.912 (0.845, 0.984)	0.888 (0.804, 0.980)	0.873 (0.794, 0.960)	0.949 (0.866, 1.040)
0.017 (0.004, 0.030)	0.910 (0.845, 0.980)	1.035 (0.937, 1.143)	0.879 (0.797, 0.969)	0.899 (0.819, 0.987)
-0.009 (-0.022, 0.005)	1.102 (1.026, 1.183)	0.975 (0.891, 1.068)	1.191 (1.075, 1.319)	1.091 (1.002, 1.187)
0.014 (0.001, 0.027)	0.912 (0.844, 0.986)	1.029 (0.935, 1.133)	0.883 (0.800, 0.975)	0.940 (0.853, 1.037)
0.015 (0.002, 0.028)	0.901 (0.836, 0.971)	1.006 (0.903, 1.120)	0.887 (0.805, 0.977)	0.883 (0.803, 0.971)
0.014 (0.001, 0.027)	0.976 (0.906, 1.053)	0.845 (0.765, 0.935)	1.040 (0.942, 1.147)	0.946 (0.864, 1.037)
0.006 (-0.008, 0.019)	0.968 (0.900, 1.040)	1.071 (0.971, 1.182)	0.977 (0.893, 1.069)	0.985 (0.898, 1.079)
-0.006 (-0.019, 0.008)	1.038 (0.968, 1.113)	1.202 (1.085, 1.331)	1.032 (0.938, 1.135)	1.073 (0.986, 1.168)
-0.003 (-0.016, 0.011)	0.991 (0.916, 1.071)	0.883 (0.802, 0.972)	1.007 (0.903, 1.123)	0.976 (0.894, 1.065)
-0.001 (-0.014, 0.013)	0.897 (0.829, 0.969)	1.158 (1.043, 1.285)	0.843 (0.763, 0.931)	0.900 (0.819, 0.990)
-0.014 (-0.028, -0.000)	1.050 (0.979, 1.126)	1.190 (1.076, 1.315)	1.076 (0.976, 1.186)	1.065 (0.980, 1.157)
-0.020 (-0.033, -0.007)	1.140 (1.056, 1.232)	0.944 (0.858, 1.039)	1.197 (1.082, 1.324)	1.135 (1.032, 1.248)
0.011 (-0.002, 0.024)	0.924 (0.860, 0.993)	1.000 (0.909, 1.099)	0.884 (0.804, 0.972)	0.932 (0.851, 1.021)
-0.012 (-0.026, 0.001)	1.087 (1.014, 1.165)	0.895 (0.812, 0.986)	1.161 (1.048, 1.288)	1.091 (1.003, 1.186)
0.011 (-0.002, 0.023)	1.061 (0.978, 1.150)	0.932 (0.847, 1.025)	1.182 (1.070, 1.306)	0.955 (0.865, 1.053)
0.013 (-0.001, 0.026)	0.966 (0.899, 1.039)	0.824 (0.746, 0.911)	0.949 (0.863, 1.043)	0.967 (0.884, 1.058)
-0.005 (-0.018, 0.009)	0.973 (0.905, 1.045)	0.832 (0.756, 0.917)	0.993 (0.905, 1.091)	0.960 (0.878, 1.048)
0.008 (-0.005, 0.022)	0.937 (0.870, 1.009)	1.024 (0.930, 1.128)	0.893 (0.811, 0.983)	0.969 (0.884, 1.062)
0.015 (0.001, 0.028)	0.948 (0.882, 1.019)	0.997 (0.902, 1.102)	0.933 (0.849, 1.026)	0.947 (0.864, 1.037)
0.019 (0.005, 0.032)	0.851 (0.790, 0.916)	0.969 (0.877, 1.071)	0.824 (0.746, 0.910)	0.839 (0.765, 0.921)
0.014 (0.001, 0.027)	0.878 (0.811, 0.949)	1.108 (1.001, 1.225)	0.831 (0.755, 0.915)	0.890 (0.810, 0.978)
-0.006 (-0.020, 0.007)	1.026 (0.957, 1.100)	0.816 (0.742, 0.898)	1.028 (0.935, 1.131)	1.053 (0.967, 1.145)
-0.004 (-0.018, 0.009)	1.011 (0.936, 1.091)	1.041 (0.937, 1.156)	0.997 (0.902, 1.102)	1.011 (0.923, 1.107)
-0.014 (-0.027, -0.000)	1.012 (0.937, 1.094)	1.062 (0.960, 1.176)	0.966 (0.876, 1.066)	1.056 (0.959, 1.162)
-0.014 (-0.027, 0.000)	1.057 (0.985, 1.134)	0.844 (0.767, 0.929)	1.111 (1.005, 1.227)	1.049 (0.965, 1.140)
0.023 (0.009, 0.036)	0.876 (0.811, 0.945)	1.017 (0.924, 1.119)	0.816 (0.743, 0.897)	0.902 (0.821, 0.991)
-0.019 (-0.033, -0.006)	1.058 (0.976, 1.146)	1.023 (0.926, 1.131)	1.042 (0.940, 1.155)	1.073 (0.969, 1.188)
-0.010 (-0.024, 0.004)	1.013 (0.946, 1.085)	1.036 (0.940, 1.141)	1.060 (0.959, 1.171)	1.012 (0.933, 1.096)
-0.004 (-0.017, 0.010)	0.927 (0.856, 1.003)	1.016 (0.924, 1.117)	0.844 (0.767, 0.928)	0.997 (0.910, 1.093)
-0.019 (-0.033, -0.006)	1.032 (0.958, 1.111)	1.002 (0.909, 1.105)	1.017 (0.926, 1.118)	1.049 (0.955, 1.151)
-0.003 (-0.016, 0.010)	0.987 (0.916, 1.064)	1.211 (1.098, 1.337)	1.017 (0.921, 1.124)	0.979 (0.894, 1.072)
-0.006 (-0.019, 0.008)	1.026 (0.953, 1.104)	1.010 (0.917, 1.111)	1.037 (0.942, 1.142)	1.010 (0.922, 1.106)
-0.018 (-0.031, -0.004)	1.025 (0.952, 1.103)	0.911 (0.825, 1.006)	1.016 (0.925, 1.116)	1.034 (0.942, 1.134)
-0.006 (-0.019, 0.007)	0.983 (0.913, 1.059)	1.099 (0.997, 1.211)	0.995 (0.904, 1.096)	0.972 (0.888, 1.064)
-0.014 (-0.027, -0.001)	1.156 (1.071, 1.247)	1.056 (0.957, 1.165)	1.216 (1.103, 1.341)	1.166 (1.060, 1.283)
-0.007 (-0.021, 0.006)	1.010 (0.942, 1.084)	1.186 (1.068, 1.316)	1.012 (0.921, 1.113)	1.030 (0.946, 1.121)
-0.006 (-0.019, 0.007)	0.926 (0.856, 1.003)	1.074 (0.973, 1.185)	0.901 (0.816, 0.994)	0.929 (0.845, 1.022)
0.007 (-0.006, 0.020)	1.044 (0.968, 1.125)	0.973 (0.881, 1.073)	1.106 (1.004, 1.217)	1.000 (0.912, 1.096)
-0.011 (-0.025, 0.002)	1.034 (0.965, 1.109)	1.159 (1.054, 1.274)	1.057 (0.959, 1.165)	1.036 (0.955, 1.124)
-0.003 (-0.015, 0.010)	1.069 (0.992, 1.153)	1.066 (0.967, 1.175)	1.185 (1.069, 1.314)	0.999 (0.913, 1.093)
0.011 (-0.002, 0.024)	1.016 (0.942, 1.097)	0.982 (0.888, 1.086)	1.079 (0.979, 1.190)	0.965 (0.879, 1.060)
-0.001 (-0.014, 0.013)	0.986 (0.918, 1.060)	1.165 (1.059, 1.282)	0.970 (0.881, 1.069)	0.977 (0.896, 1.065)
-0.009 (-0.023, 0.004)	1.086 (1.010, 1.167)	1.098 (0.999, 1.207)	1.163 (1.059, 1.277)	1.060 (0.969, 1.159)
0.012 (-0.001, 0.025)	1.026 (0.951, 1.106)	1.053 (0.955, 1.161)	1.075 (0.977, 1.184)	0.984 (0.896, 1.079)
-0.002 (-0.015, 0.011)	1.016 (0.942, 1.096)	1.168 (1.061, 1.287)	0.989 (0.895, 1.092)	1.017 (0.927, 1.116)
-0.004 (-0.018, 0.009)	1.096 (1.019, 1.179)	0.924 (0.840, 1.017)	1.171 (1.065, 1.287)	1.066 (0.975, 1.165)
0.006 (-0.008, 0.019)	1.063 (0.988, 1.143)	1.074 (0.974, 1.183)	1.106 (1.007, 1.215)	1.044 (0.955, 1.141)
-0.007 (-0.021, 0.006)	1.059 (0.984, 1.140)	1.074 (0.977, 1.181)	1.065 (0.967, 1.173)	1.054 (0.964, 1.152)
-0.010 (-0.023, 0.003)	1.096 (1.019, 1.178)	1.048 (0.954, 1.151)	1.172 (1.065, 1.289)	1.068 (0.978, 1.166)
-0.002 (-0.015, 0.012)	0.952 (0.886, 1.022)	1.090 (0.991, 1.199)	0.928 (0.845, 1.020)	0.966 (0.887, 1.051)
0.001 (-0.012, 0.015)	1.049 (0.974, 1.129)	1.149 (1.045, 1.264)	1.085 (0.986, 1.194)	1.036 (0.947, 1.132)
-0.010 (-0.023, 0.004)	1.122 (1.044, 1.206)	0.867 (0.785, 0.958)	1.160 (1.055, 1.274)	1.137 (1.041, 1.242)
-0.009 (-0.022, 0.004)	0.876 (0.811, 0.947)	1.232 (1.083, 1.402)	0.871 (0.789, 0.961)	0.913 (0.833, 1.002)
-0.010 (-0.021, 0.002)	1.086 (0.984, 1.199)	0.899 (0.819, 0.987)	1.228 (1.082, 1.395)	0.971 (0.852, 1.106)
0.001 (-0.012, 0.014)	0.972 (0.902, 1.047)	1.041 (0.947, 1.145)	0.903 (0.823, 0.991)	1.019 (0.929, 1.117)
