# Supplementary material for: Association of egg consumption, metabolic markers, and risk of cardiovascular diseases: A nested case-control study
Source: eLife. 2022 May 24;11:e72909. doi: 10.7554/eLife.72909 (PMC9129873; doi:10.7554/eLife.72909)
Supplement: Supplementary file 1. — (a) Associations (95% CI) of egg consumption with all 225 log-transformed metabolic markers or devided traits, and of these markers with CVD risk. (b). ORs (95% CI) for MI, IS, and ICH per SD higher log-transformed metabolic markers. [file elife-72909-supp1.xlsx]

## Sheet: Supplementary File 1a
Supplementary File 1a. Associations (95% CI) of egg consumption with all 225 log-transformed metabolic markers or devided traits, and of these markers with risks of CVD.
Metabolic marker	Unit	n	Coefficient (95% CI)	p	FDR-p	OR (95% CI)	p	FDR-p
Mean diameter for VLDL particles	nm	4777	-0.005 (-0.018, 0.009)	0.512	0.616	1.086 (1.010, 1.167)	0.026	0.054
Mean diameter for LDL particles	nm	4777	0.008 (-0.005, 0.020)	0.228	0.333	0.885 (0.818, 0.956)	0.002	0.008
Mean diameter for HDL particles	nm	4777	0.024 (0.011, 0.037)	<0.001	0.006	0.897 (0.832, 0.967)	0.004	0.015
Concentration of chylomicrons and extremely large VLDL particles	mol/l	4778	-0.011 (-0.024, 0.003)	0.118	0.217	1.069 (0.997, 1.147)	0.061	0.108
Concentration of very large VLDL particles	mol/l	4778	-0.008 (-0.021, 0.006)	0.26	0.368	1.090 (1.015, 1.170)	0.018	0.042
Concentration of large VLDL particles	mol/l	4778	-0.010 (-0.024, 0.003)	0.139	0.243	1.118 (1.040, 1.201)	0.002	0.009
Concentration of medium VLDL particles	mol/l	4778	-0.012 (-0.025, 0.002)	0.082	0.193	1.135 (1.056, 1.221)	0.001	0.004
Concentration of small VLDL particles	mol/l	4778	-0.016 (-0.029, -0.002)	0.021	0.107	1.155 (1.074, 1.243)	<0.001	0.003
Concentration of very small VLDL particles	mol/l	4778	-0.014 (-0.027, -0.001)	0.032	0.122	1.143 (1.061, 1.232)	<0.001	0.004
Concentration of IDL particles	mol/l	4777	-0.011 (-0.024, 0.002)	0.102	0.205	1.102 (1.022, 1.188)	0.011	0.03
Concentration of large LDL particles	mol/l	4778	-0.013 (-0.026, 0.000)	0.056	0.159	1.114 (1.034, 1.201)	0.005	0.015
Concentration of medium LDL particles	mol/l	4778	-0.015 (-0.028, -0.002)	0.026	0.11	1.129 (1.048, 1.216)	0.001	0.006
Concentration of small LDL particles	mol/l	4778	-0.013 (-0.027, -0.000)	0.042	0.134	1.142 (1.059, 1.230)	0.001	0.004
Concentration of very large HDL particles	mol/l	4778	0.025 (0.012, 0.038)	<0.001	0.007	0.961 (0.893, 1.035)	0.295	0.39
Concentration of large HDL particles	mol/l	4778	0.026 (0.014, 0.039)	<0.001	0.004	0.883 (0.818, 0.954)	0.002	0.007
Concentration of medium HDL particles	mol/l	4778	0.012 (-0.001, 0.025)	0.064	0.174	0.924 (0.856, 0.998)	0.044	0.085
Concentration of small HDL particles	mol/l	4778	0.002 (-0.011, 0.014)	0.809	0.859	1.024 (0.949, 1.105)	0.539	0.629
Total lipids in chylomicrons and extremely large VLDL	mmol/l	4778	-0.011 (-0.024, 0.003)	0.118	0.216	1.070 (0.998, 1.148)	0.057	0.105
Total lipids in very large VLDL	mmol/l	4778	-0.008 (-0.021, 0.006)	0.259	0.369	1.090 (1.015, 1.170)	0.018	0.042
Total lipids in large VLDL	mmol/l	4778	-0.010 (-0.024, 0.003)	0.139	0.241	1.116 (1.039, 1.199)	0.003	0.009
Total lipids in medium VLDL	mmol/l	4778	-0.012 (-0.025, 0.002)	0.083	0.192	1.135 (1.056, 1.220)	0.001	0.004
Total lipids in small VLDL	mmol/l	4778	-0.016 (-0.029, -0.002)	0.02	0.106	1.157 (1.075, 1.244)	<0.001	0.003
Total lipids in very small VLDL	mmol/l	4778	-0.014 (-0.028, -0.001)	0.03	0.118	1.135 (1.053, 1.223)	0.001	0.005
Total lipids in IDL	mmol/l	4777	-0.011 (-0.024, 0.002)	0.091	0.195	1.096 (1.017, 1.182)	0.017	0.039
Total lipids in large LDL	mmol/l	4778	-0.013 (-0.026, -0.000)	0.049	0.144	1.109 (1.029, 1.196)	0.007	0.02
Total lipids in medium LDL	mmol/l	4778	-0.015 (-0.028, -0.002)	0.025	0.109	1.126 (1.045, 1.213)	0.002	0.007
Total lipids in small LDL	mmol/l	4778	-0.014 (-0.027, -0.001)	0.04	0.131	1.136 (1.054, 1.224)	0.001	0.004
Total lipids in very large HDL	mmol/l	4778	0.025 (0.011, 0.038)	<0.001	0.006	0.962 (0.894, 1.036)	0.305	0.399
Total lipids in large HDL	mmol/l	4778	0.026 (0.014, 0.039)	<0.001	0.003	0.882 (0.817, 0.953)	0.001	0.006
Total lipids in medium HDL	mmol/l	4778	0.012 (-0.001, 0.025)	0.066	0.172	0.922 (0.853, 0.995)	0.038	0.074
Total lipids in small HDL	mmol/l	4778	0.002 (-0.011, 0.014)	0.818	0.864	1.020 (0.945, 1.100)	0.611	0.702
Total cholesterol	mmol/l	4777	-0.005 (-0.018, 0.008)	0.431	0.536	1.108 (1.028, 1.195)	0.007	0.021
Total cholesterol in VLDL	mmol/l	4777	-0.014 (-0.027, -0.001)	0.033	0.121	1.152 (1.069, 1.242)	<0.001	0.002
Total cholesterol in chylomicrons and extremely large VLDL	mmol/l	4777	-0.014 (-0.027, -0.000)	0.043	0.134	1.151 (1.070, 1.239)	<0.001	0.003
Total cholesterol in very large VLDL	mmol/l	4778	-0.012 (-0.025, 0.002)	0.086	0.194	1.072 (0.999, 1.150)	0.053	0.099
Total cholesterol in large VLDL	mmol/l	4778	-0.008 (-0.022, 0.005)	0.218	0.323	1.071 (0.998, 1.149)	0.058	0.105
Total cholesterol in medium VLDL	mmol/l	4778	-0.011 (-0.024, 0.003)	0.121	0.219	1.095 (1.020, 1.175)	0.012	0.032
Total cholesterol in small VLDL	mmol/l	4778	-0.012 (-0.025, 0.002)	0.086	0.195	1.122 (1.044, 1.206)	0.002	0.007
Total cholesterol in very small VLDL	mmol/l	4778	-0.018 (-0.031, -0.005)	0.007	0.058	1.151 (1.069, 1.239)	<0.001	0.003
Total cholesterol in IDL	mmol/l	4778	-0.015 (-0.028, -0.002)	0.023	0.106	1.096 (1.017, 1.182)	0.017	0.04
Total cholesterol in LDL	mmol/l	4778	-0.012 (-0.025, 0.002)	0.083	0.192	1.084 (1.006, 1.169)	0.035	0.069
Total cholesterol in large LDL	mmol/l	4777	-0.017 (-0.030, -0.004)	0.013	0.075	1.110 (1.028, 1.198)	0.008	0.022
Total cholesterol in medium LDL	mmol/l	4778	-0.015 (-0.028, -0.002)	0.022	0.109	1.102 (1.022, 1.189)	0.011	0.03
Total cholesterol in small LDL	mmol/l	4778	-0.017 (-0.030, -0.004)	0.011	0.07	1.100 (1.022, 1.184)	0.012	0.031
Total cholesterol in HDL	mmol/l	4778	-0.016 (-0.029, -0.003)	0.016	0.085	1.099 (1.021, 1.183)	0.012	0.032
Total cholesterol in HDL2	mmol/l	4777	0.024 (0.011, 0.037)	<0.001	0.007	0.912 (0.846, 0.983)	0.016	0.038
Total cholesterol in HDL3	mmol/l	4777	0.023 (0.010, 0.037)	<0.001	0.008	0.897 (0.833, 0.967)	0.005	0.015
Total cholesterol in very large HDL	mmol/l	4777	0.017 (0.004, 0.030)	0.01	0.068	1.061 (0.984, 1.144)	0.121	0.184
Total cholesterol in large HDL	mmol/l	4778	0.022 (0.008, 0.035)	0.002	0.021	1.001 (0.931, 1.077)	0.978	0.978
Total cholesterol in medium HDL	mmol/l	4778	0.027 (0.014, 0.040)	<0.001	0.005	0.877 (0.812, 0.947)	0.001	0.004
Total cholesterol in small HDL	mmol/l	4778	0.009 (-0.004, 0.022)	0.183	0.293	0.915 (0.847, 0.988)	0.024	0.051
Remnant cholesterol (non-HDL, non-LDL -cholesterol)	mmol/l	4778	-0.004 (-0.017, 0.009)	0.525	0.625	1.032 (0.959, 1.111)	0.398	0.506
Esterified cholesterol	mmol/l	4774	0.005 (-0.008, 0.019)	0.448	0.554	0.985 (0.899, 1.079)	0.745	0.81
Cholesterol esters in chylomicrons and extremely large VLDL	mmol/l	4778	-0.013 (-0.026, 0.001)	0.066	0.17	1.071 (0.999, 1.150)	0.055	0.101
Cholesterol esters in very large VLDL	mmol/l	4778	-0.009 (-0.023, 0.004)	0.188	0.295	1.062 (0.989, 1.139)	0.096	0.153
Cholesterol esters in large VLDL	mmol/l	4778	-0.012 (-0.026, 0.002)	0.086	0.192	1.064 (0.993, 1.140)	0.077	0.131
Cholesterol esters in medium VLDL	mmol/l	4778	-0.013 (-0.026, 0.001)	0.063	0.173	1.105 (1.028, 1.188)	0.007	0.02
Cholesterol esters in small VLDL	mmol/l	4778	-0.020 (-0.033, -0.007)	0.002	0.028	1.130 (1.049, 1.217)	0.001	0.006
Cholesterol esters in very small VLDL	mmol/l	4778	-0.015 (-0.028, -0.002)	0.023	0.104	1.090 (1.011, 1.176)	0.025	0.053
Cholesterol esters in IDL	mmol/l	4778	-0.012 (-0.025, 0.001)	0.081	0.194	1.097 (1.018, 1.183)	0.016	0.039
Cholesterol esters in large LDL	mmol/l	4778	-0.017 (-0.030, -0.004)	0.011	0.07	1.121 (1.035, 1.214)	0.005	0.017
Cholesterol esters in medium LDL	mmol/l	4778	-0.019 (-0.032, -0.005)	0.006	0.05	1.073 (0.997, 1.155)	0.06	0.106
Cholesterol esters in small LDL	mmol/l	4778	-0.017 (-0.030, -0.004)	0.013	0.075	1.065 (0.990, 1.146)	0.091	0.148
Cholesterol esters in very large HDL	mmol/l	4778	0.020 (0.007, 0.034)	0.003	0.03	1.019 (0.947, 1.095)	0.62	0.708
Cholesterol esters in large HDL	mmol/l	4778	0.027 (0.014, 0.040)	<0.001	0.008	0.875 (0.811, 0.945)	0.001	0.004
Cholesterol esters in medium HDL	mmol/l	4778	0.008 (-0.005, 0.021)	0.243	0.353	0.916 (0.848, 0.990)	0.026	0.054
Cholesterol esters in small HDL	mmol/l	4778	-0.004 (-0.017, 0.010)	0.593	0.677	1.026 (0.953, 1.105)	0.493	0.593
Free cholesterol	mmol/l	4774	-0.014 (-0.027, -0.001)	0.037	0.124	1.105 (1.026, 1.191)	0.008	0.024
Free cholesterol in chylomicrons and extremely large VLDL	mmol/l	4778	-0.012 (-0.026, 0.002)	0.081	0.193	1.069 (0.997, 1.147)	0.062	0.109
Free cholesterol in very large VLDL	mmol/l	4778	-0.007 (-0.021, 0.006)	0.305	0.409	1.064 (0.992, 1.142)	0.082	0.137
Free cholesterol in large VLDL	mmol/l	4778	-0.011 (-0.025, 0.002)	0.105	0.202	1.099 (1.024, 1.179)	0.009	0.024
Free cholesterol in medium VLDL	mmol/l	4778	-0.012 (-0.025, 0.002)	0.09	0.197	1.131 (1.053, 1.216)	0.001	0.004
Free cholesterol in small VLDL	mmol/l	4778	-0.014 (-0.027, -0.000)	0.043	0.132	1.154 (1.073, 1.242)	<0.001	0.003
Free cholesterol in very small VLDL	mmol/l	4778	-0.013 (-0.026, 0.000)	0.059	0.165	1.099 (1.021, 1.184)	0.012	0.032
Free cholesterol in IDL	mmol/l	4778	-0.011 (-0.025, 0.002)	0.094	0.199	1.050 (0.974, 1.131)	0.204	0.279
Free cholesterol in large LDL	mmol/l	4778	-0.012 (-0.026, 0.001)	0.068	0.171	1.070 (0.993, 1.153)	0.077	0.132
Free cholesterol in medium LDL	mmol/l	4778	-0.011 (-0.024, 0.002)	0.09	0.195	1.119 (1.038, 1.206)	0.003	0.011
Free cholesterol in small LDL	mmol/l	4778	-0.011 (-0.024, 0.002)	0.111	0.208	1.124 (1.043, 1.211)	0.002	0.008
Free cholesterol in very large HDL	mmol/l	4778	0.023 (0.010, 0.037)	0.001	0.009	0.960 (0.892, 1.033)	0.276	0.367
Free cholesterol in large HDL	mmol/l	4778	0.025 (0.012, 0.038)	<0.001	0.006	0.890 (0.824, 0.962)	0.003	0.011
Free cholesterol in medium HDL	mmol/l	4778	0.012 (-0.001, 0.025)	0.067	0.171	0.914 (0.847, 0.987)	0.022	0.047
Free cholesterol in small HDL	mmol/l	4778	0.008 (-0.005, 0.021)	0.209	0.322	0.972 (0.901, 1.050)	0.472	0.577
Total triglycerides	mmol/l	4777	-0.009 (-0.022, 0.005)	0.213	0.318	1.141 (1.061, 1.227)	<0.001	0.003
Triglycerides in VLDL	mmol/l	4777	-0.011 (-0.024, 0.002)	0.109	0.208	1.135 (1.056, 1.221)	0.001	0.004
Triglycerides in chylomicrons and extremely large VLDL	mmol/l	4778	-0.011 (-0.025, 0.002)	0.102	0.207	1.061 (0.990, 1.138)	0.094	0.151
Triglycerides in very large VLDL	mmol/l	4778	-0.008 (-0.021, 0.006)	0.266	0.375	1.089 (1.014, 1.170)	0.019	0.041
Triglycerides in large VLDL	mmol/l	4778	-0.010 (-0.024, 0.003)	0.142	0.242	1.121 (1.044, 1.205)	0.002	0.007
Triglycerides in medium VLDL	mmol/l	4778	-0.012 (-0.025, 0.001)	0.079	0.193	1.138 (1.058, 1.223)	<0.001	0.004
Triglycerides in small VLDL	mmol/l	4778	-0.015 (-0.029, -0.002)	0.026	0.109	1.146 (1.066, 1.233)	<0.001	0.002
Triglycerides in very small VLDL	mmol/l	4778	-0.011 (-0.024, 0.002)	0.104	0.205	1.147 (1.066, 1.235)	<0.001	0.002
Triglycerides in IDL	mmol/l	4778	-0.004 (-0.017, 0.009)	0.56	0.653	1.141 (1.058, 1.230)	0.001	0.004
Triglycerides in LDL	mmol/l	4777	-0.000 (-0.014, 0.013)	0.95	0.967	1.141 (1.058, 1.230)	0.001	0.004
Triglycerides in large LDL	mmol/l	4778	-0.002 (-0.015, 0.011)	0.794	0.859	1.135 (1.051, 1.225)	0.001	0.005
Triglycerides in medium LDL	mmol/l	4778	-0.003 (-0.016, 0.011)	0.688	0.759	1.152 (1.069, 1.241)	<0.001	0.003
Triglycerides in small LDL	mmol/l	4778	-0.006 (-0.020, 0.007)	0.363	0.48	1.179 (1.095, 1.269)	<0.001	0.001
Triglycerides in HDL	mmol/l	4777	0.006 (-0.007, 0.019)	0.372	0.484	1.057 (0.981, 1.139)	0.145	0.209
Triglycerides in very large HDL	mmol/l	4778	0.007 (-0.006, 0.020)	0.287	0.394	1.068 (0.991, 1.151)	0.086	0.142
Triglycerides in large HDL	mmol/l	4778	0.014 (0.002, 0.027)	0.024	0.105	0.974 (0.899, 1.055)	0.514	0.609
Triglycerides in medium HDL	mmol/l	4778	-0.003 (-0.016, 0.011)	0.7	0.768	1.045 (0.971, 1.123)	0.238	0.321
Triglycerides in small HDL	mmol/l	4778	-0.004 (-0.018, 0.009)	0.552	0.647	1.101 (1.024, 1.184)	0.01	0.026
Phospholipids in chylomicrons and extremely large VLDL	mmol/l	4771	-0.016 (-0.029, -0.003)	0.014	0.077	1.052 (0.977, 1.132)	0.177	0.243
Phospholipids in very large VLDL	mmol/l	4771	-0.003 (-0.016, 0.010)	0.669	0.749	1.094 (1.017, 1.178)	0.017	0.039
Phospholipids in large VLDL	mmol/l	4771	-0.004 (-0.017, 0.010)	0.58	0.673	1.089 (1.011, 1.172)	0.024	0.051
Phospholipids in medium VLDL	mmol/l	4771	-0.001 (-0.014, 0.013)	0.94	0.962	1.062 (0.987, 1.142)	0.106	0.165
Phospholipids in small VLDL	mmol/l	4778	-0.012 (-0.025, 0.002)	0.087	0.192	1.067 (0.995, 1.145)	0.069	0.12
Phospholipids in very small VLDL	mmol/l	4778	-0.008 (-0.021, 0.006)	0.277	0.385	1.066 (0.994, 1.144)	0.073	0.126
Phospholipids in IDL	mmol/l	4778	-0.011 (-0.024, 0.003)	0.125	0.222	1.116 (1.039, 1.198)	0.003	0.009
Phospholipids in large LDL	mmol/l	4778	-0.012 (-0.026, 0.001)	0.074	0.184	1.136 (1.057, 1.221)	0.001	0.004
Phospholipids in medium LDL	mmol/l	4778	-0.014 (-0.027, -0.001)	0.042	0.136	1.142 (1.062, 1.229)	<0.001	0.003
Phospholipids in small LDL	mmol/l	4778	-0.013 (-0.026, 0.000)	0.052	0.15	1.108 (1.029, 1.195)	0.007	0.021
Phospholipids in very large HDL	mmol/l	4778	-0.011 (-0.024, 0.002)	0.096	0.199	1.078 (1.001, 1.162)	0.047	0.09
Phospholipids in large HDL	mmol/l	4778	-0.012 (-0.025, 0.001)	0.065	0.172	1.113 (1.032, 1.200)	0.005	0.017
Phospholipids in medium HDL	mmol/l	4778	-0.012 (-0.025, 0.001)	0.071	0.178	1.156 (1.072, 1.247)	<0.001	0.003
Phospholipids in small HDL	mmol/l	4778	-0.008 (-0.021, 0.005)	0.213	0.319	1.155 (1.070, 1.246)	<0.001	0.003
Apolipoprotein A-I	g/l	4778	0.025 (0.012, 0.038)	<0.001	0.006	0.927 (0.861, 0.999)	0.046	0.088
Apolipoprotein B	g/l	4778	0.025 (0.013, 0.038)	<0.001	0.005	0.890 (0.824, 0.961)	0.003	0.01
Ratio of apolipoprotein B to apolipoprotein A-I		4778	0.015 (0.002, 0.027)	0.022	0.108	0.926 (0.857, 1.000)	0.051	0.096
Total fatty acids	mmol/l	4778	0.006 (-0.007, 0.019)	0.377	0.488	0.977 (0.906, 1.054)	0.55	0.638
Saturated fatty acids	mmol/l	4777	0.019 (0.006, 0.032)	0.003	0.035	0.989 (0.917, 1.067)	0.782	0.83
Monounsaturated fatty acids; 16:1, 18:1	mmol/l	4775	-0.015 (-0.028, -0.002)	0.027	0.111	1.186 (1.100, 1.279)	<0.001	0.001
Polyunsaturated fatty acids	mmol/l	4775	-0.023 (-0.036, -0.010)	<0.001	0.008	1.188 (1.102, 1.281)	<0.001	0.001
Omega-3 fatty acids	mmol/l	4769	-0.008 (-0.022, 0.005)	0.21	0.319	1.151 (1.069, 1.240)	<0.001	0.003
22:6, docosahexaenoic acid	mmol/l	4769	-0.009 (-0.022, 0.004)	0.194	0.304	1.131 (1.051, 1.217)	0.001	0.005
Omega-6 fatty acids	mmol/l	4769	-0.007 (-0.020, 0.006)	0.308	0.41	1.149 (1.067, 1.236)	<0.001	0.003
18:2, linoleic acid	mmol/l	4769	-0.009 (-0.022, 0.004)	0.178	0.288	1.156 (1.071, 1.248)	<0.001	0.003
Ratio of saturated fatty acids to total fatty acids	%	4769	-0.006 (-0.018, 0.007)	0.377	0.485	1.143 (1.058, 1.235)	0.001	0.004
Ratio of monounsaturated fatty acids to total fatty acids	%	4769	-0.007 (-0.020, 0.005)	0.259	0.371	1.152 (1.067, 1.243)	<0.001	0.003
Ratio of polyunsaturated fatty acids to total fatty acids	%	4769	-0.009 (-0.022, 0.004)	0.163	0.272	1.152 (1.067, 1.243)	<0.001	0.003
Ratio of omega-3 fatty acids to total fatty acids	%	4769	-0.010 (-0.023, 0.004)	0.165	0.273	0.991 (0.910, 1.079)	0.837	0.868
Ratio of 22:6 docosahexaenoic acid to total fatty acids	%	4778	0.005 (-0.008, 0.018)	0.487	0.596	0.911 (0.843, 0.984)	0.018	0.041
Ratio of omega-6 fatty acids to total fatty acids	%	4778	0.003 (-0.010, 0.016)	0.682	0.76	1.062 (0.986, 1.144)	0.114	0.175
Ratio of 18:2 linoleic acid to total fatty acids	%	4778	0.000 (-0.013, 0.013)	0.985	0.989	1.010 (0.937, 1.088)	0.798	0.839
Alanine	mmol/l	4778	0.003 (-0.009, 0.015)	0.641	0.725	1.033 (0.956, 1.116)	0.416	0.522
Glutamine	mmol/l	4778	0.004 (-0.010, 0.017)	0.592	0.679	0.997 (0.929, 1.071)	0.937	0.95
Histidine	mmol/l	4778	0.001 (-0.012, 0.014)	0.928	0.957	1.005 (0.934, 1.080)	0.903	0.924
Isoleucine	mmol/l	4778	0.000 (-0.014, 0.014)	0.996	0.996	0.973 (0.903, 1.049)	0.48	0.584
Leucine	mmol/l	4776	-0.010 (-0.024, 0.003)	0.132	0.232	1.003 (0.933, 1.078)	0.943	0.952
Phenylalanine	mmol/l	4758	-0.017 (-0.030, -0.004)	0.011	0.068	0.918 (0.850, 0.991)	0.029	0.059
Tyrosine	mmol/l	4768	-0.009 (-0.023, 0.004)	0.184	0.292	0.988 (0.920, 1.062)	0.751	0.808
Valine	mmol/l	4776	0.008 (-0.005, 0.021)	0.209	0.32	1.015 (0.942, 1.093)	0.7	0.78
Citrate	mmol/l	4777	-0.000 (-0.013, 0.012)	0.954	0.967	1.013 (0.938, 1.094)	0.749	0.811
Glucose	mmol/l	4777	0.018 (0.005, 0.030)	0.007	0.057	0.995 (0.921, 1.076)	0.91	0.926
Lactate	mmol/l	4768	0.018 (0.004, 0.031)	0.009	0.066	0.994 (0.922, 1.071)	0.872	0.896
Glycoprotein acetyls, mainly a1-acid glycoprotein	mmol/l	4755	0.002 (-0.011, 0.015)	0.798	0.859	1.002 (0.928, 1.081)	0.968	0.973
Acetoacetate	mmol/l	4778	0.014 (0.000, 0.027)	0.042	0.136	0.943 (0.874, 1.016)	0.122	0.184
Acetate	mmol/l	4766	-0.005 (-0.018, 0.009)	0.503	0.609	1.236 (1.143, 1.336)	<0.001	0.001
3-hydroxybutyrate	mmol/l	4777	0.001 (-0.012, 0.013)	0.936	0.962	1.055 (0.979, 1.138)	0.16	0.227
Cholesterol esters to total lipids ratio in IDL	%	4777	-0.008 (-0.021, 0.005)	0.222	0.326	1.274 (1.179, 1.377)	<0.001	0.001
Cholesterol esters to total lipids ratio in chylomicrons and extremely large VLDL	%	4777	0.010 (-0.003, 0.023)	0.122	0.22	1.053 (0.978, 1.134)	0.17	0.238
Cholesterol esters to total lipids ratio in large HDL	%	4777	0.019 (0.007, 0.032)	0.002	0.029	0.980 (0.902, 1.064)	0.628	0.714
Cholesterol esters to total lipids ratio in large LDL	%	4667	-0.002 (-0.015, 0.010)	0.736	0.8	1.162 (1.069, 1.263)	<0.001	0.004
Cholesterol esters to total lipids ratio in large VLDL	%	4778	-0.011 (-0.024, 0.002)	0.109	0.206	1.060 (0.983, 1.143)	0.13	0.192
Cholesterol esters to total lipids ratio in medium HDL	%	4778	-0.015 (-0.028, -0.001)	0.037	0.124	1.054 (0.982, 1.131)	0.145	0.21
Cholesterol esters to total lipids ratio in medium LDL	%	4778	0.023 (0.010, 0.036)	0.001	0.011	0.872 (0.808, 0.942)	<0.001	0.004
Cholesterol esters to total lipids ratio in medium VLDL	%	4778	-0.018 (-0.031, -0.004)	0.01	0.068	1.114 (1.006, 1.233)	0.037	0.074
Cholesterol esters to total lipids ratio in small HDL	%	4778	-0.009 (-0.023, 0.004)	0.183	0.292	0.994 (0.928, 1.064)	0.862	0.889
Cholesterol esters to total lipids ratio in small LDL	%	4778	-0.007 (-0.020, 0.006)	0.291	0.397	0.941 (0.868, 1.020)	0.142	0.207
Cholesterol esters to total lipids ratio in small VLDL	%	4778	-0.018 (-0.032, -0.005)	0.007	0.057	1.034 (0.960, 1.113)	0.378	0.484
Cholesterol esters to total lipids ratio in very large HDL	%	4778	-0.003 (-0.016, 0.010)	0.624	0.709	0.942 (0.872, 1.017)	0.126	0.189
Cholesterol esters to total lipids ratio in very large VLDL	%	4778	-0.004 (-0.018, 0.009)	0.548	0.645	1.022 (0.949, 1.101)	0.567	0.654
Cholesterol esters to total lipids ratio in very small VLDL	%	4778	-0.016 (-0.029, -0.002)	0.021	0.106	1.026 (0.953, 1.105)	0.489	0.591
Free cholesterol to total lipids ratio in IDL	%	4778	-0.011 (-0.024, 0.003)	0.114	0.212	0.987 (0.916, 1.064)	0.737	0.805
Free cholesterol to total lipids ratio in chylomicrons and extremely large VLDL	%	4778	-0.017 (-0.029, -0.004)	0.01	0.067	1.186 (1.098, 1.282)	<0.001	0.001
Free cholesterol to total lipids ratio in large HDL	%	4778	-0.008 (-0.021, 0.006)	0.28	0.387	0.991 (0.923, 1.063)	0.8	0.837
Free cholesterol to total lipids ratio in large LDL	%	4778	-0.005 (-0.018, 0.008)	0.478	0.587	0.923 (0.855, 0.997)	0.042	0.082
Free cholesterol to total lipids ratio in large VLDL	%	4778	-0.008 (-0.021, 0.006)	0.257	0.37	0.968 (0.892, 1.049)	0.425	0.532
Free cholesterol to total lipids ratio in medium HDL	%	4778	-0.015 (-0.028, -0.001)	0.035	0.123	1.054 (0.983, 1.130)	0.142	0.209
Free cholesterol to total lipids ratio in medium LDL	%	4778	0.015 (0.001, 0.028)	0.033	0.121	0.933 (0.860, 1.013)	0.098	0.155
Free cholesterol to total lipids ratio in medium VLDL	%	4778	0.000 (-0.013, 0.014)	0.963	0.972	0.879 (0.811, 0.954)	0.002	0.007
Free cholesterol to total lipids ratio in small HDL	%	4778	-0.011 (-0.025, 0.002)	0.101	0.206	1.062 (0.991, 1.138)	0.087	0.142
Free cholesterol to total lipids ratio in small LDL	%	4778	0.010 (-0.003, 0.023)	0.127	0.226	0.912 (0.845, 0.984)	0.017	0.041
Free cholesterol to total lipids ratio in small VLDL	%	4778	0.017 (0.004, 0.030)	0.013	0.073	0.910 (0.845, 0.980)	0.013	0.033
Free cholesterol to total lipids ratio in very large HDL	%	4778	-0.009 (-0.022, 0.005)	0.211	0.319	1.102 (1.026, 1.183)	0.008	0.022
Free cholesterol to total lipids ratio in very large VLDL	%	4778	0.014 (0.001, 0.027)	0.031	0.121	0.912 (0.844, 0.986)	0.021	0.045
Free cholesterol to total lipids ratio in very small VLDL	%	4778	0.015 (0.002, 0.028)	0.023	0.106	0.901 (0.836, 0.971)	0.006	0.02
Phospholipids to total lipds ratio in IDL	%	4778	0.014 (0.001, 0.027)	0.035	0.122	0.976 (0.906, 1.053)	0.533	0.625
Phospholipids to total lipds ratio in chylomicrons and extremely large VLDL	%	4778	0.006 (-0.008, 0.019)	0.416	0.523	0.968 (0.900, 1.040)	0.373	0.48
Phospholipids to total lipds ratio in large HDL	%	4778	-0.006 (-0.019, 0.008)	0.402	0.508	1.038 (0.968, 1.113)	0.298	0.393
Phospholipids to total lipds ratio in large LDL	%	4778	-0.003 (-0.016, 0.011)	0.688	0.763	0.991 (0.916, 1.071)	0.817	0.851
Phospholipids to total lipds ratio in large VLDL	%	4778	-0.001 (-0.014, 0.013)	0.912	0.95	0.897 (0.829, 0.969)	0.006	0.019
Phospholipids to total lipds ratio in medium HDL	%	4778	-0.014 (-0.028, -0.000)	0.045	0.134	1.050 (0.979, 1.126)	0.171	0.237
Phospholipids to total lipds ratio in medium LDL	%	4778	-0.020 (-0.033, -0.007)	0.002	0.027	1.140 (1.056, 1.232)	0.001	0.004
Phospholipids to total lipds ratio in medium VLDL	%	4778	0.011 (-0.002, 0.024)	0.105	0.204	0.924 (0.860, 0.993)	0.032	0.065
Phospholipids to total lipds ratio in small HDL	%	4778	-0.012 (-0.026, 0.001)	0.081	0.195	1.087 (1.014, 1.165)	0.019	0.042
Phospholipids to total lipds ratio in small LDL	%	4778	0.011 (-0.002, 0.023)	0.103	0.206	1.061 (0.978, 1.150)	0.154	0.22
Phospholipids to total lipds ratio in small VLDL	%	4778	0.013 (-0.001, 0.026)	0.06	0.166	0.966 (0.899, 1.039)	0.352	0.455
Phospholipids to total lipds ratio in very large HDL	%	4778	-0.005 (-0.018, 0.009)	0.502	0.611	0.973 (0.905, 1.045)	0.451	0.561
Phospholipids to total lipds ratio in very large VLDL	%	4778	0.008 (-0.005, 0.022)	0.207	0.321	0.937 (0.870, 1.009)	0.086	0.142
Phospholipids to total lipds ratio in very small VLDL	%	4778	0.015 (0.001, 0.028)	0.029	0.118	0.948 (0.882, 1.019)	0.149	0.214
Total cholesterol to total lipids ratio in IDL	%	4778	0.019 (0.005, 0.032)	0.006	0.051	0.851 (0.790, 0.916)	<0.001	0.001
Total cholesterol to total lipids ratio in chylomicrons and extremely large VLDL	%	4778	0.014 (0.001, 0.027)	0.033	0.119	0.878 (0.811, 0.949)	0.001	0.005
Total cholesterol to total lipids ratio in large HDL	%	4778	-0.006 (-0.020, 0.007)	0.372	0.487	1.026 (0.957, 1.100)	0.467	0.574
Total cholesterol to total lipids ratio in large LDL	%	4778	-0.004 (-0.018, 0.009)	0.534	0.632	1.011 (0.936, 1.091)	0.789	0.833
Total cholesterol to total lipids ratio in large VLDL	%	4778	-0.014 (-0.027, -0.000)	0.044	0.133	1.012 (0.937, 1.094)	0.759	0.814
Total cholesterol to total lipids ratio in medium HDL	%	4778	-0.014 (-0.027, 0.000)	0.05	0.147	1.057 (0.985, 1.134)	0.121	0.185
Total cholesterol to total lipids ratio in medium LDL	%	4778	0.023 (0.009, 0.036)	0.001	0.012	0.876 (0.811, 0.945)	0.001	0.004
Total cholesterol to total lipids ratio in medium VLDL	%	4778	-0.019 (-0.033, -0.006)	0.005	0.046	1.058 (0.976, 1.146)	0.17	0.239
Total cholesterol to total lipids ratio in small HDL	%	4778	-0.010 (-0.024, 0.004)	0.148	0.25	1.013 (0.946, 1.085)	0.715	0.788
Total cholesterol to total lipids ratio in small LDL	%	4778	-0.004 (-0.017, 0.010)	0.584	0.673	0.927 (0.856, 1.003)	0.06	0.107
Total cholesterol to total lipids ratio in small VLDL	%	4778	-0.019 (-0.033, -0.006)	0.005	0.045	1.032 (0.958, 1.111)	0.405	0.511
Total cholesterol to total lipids ratio in very large HDL	%	4778	-0.003 (-0.016, 0.010)	0.66	0.743	0.987 (0.916, 1.064)	0.737	0.808
Total cholesterol to total lipids ratio in very large VLDL	%	4778	-0.006 (-0.019, 0.008)	0.395	0.503	1.026 (0.953, 1.104)	0.5	0.598
Total cholesterol to total lipids ratio in very small VLDL	%	4778	-0.018 (-0.031, -0.004)	0.009	0.064	1.025 (0.952, 1.103)	0.514	0.606
Triglycerides to total lipids ratio in IDL	%	4778	-0.006 (-0.019, 0.007)	0.363	0.478	0.983 (0.913, 1.059)	0.653	0.739
Triglycerides to total lipids ratio in chylomicrons and extremely large VLDL	%	4778	-0.014 (-0.027, -0.001)	0.032	0.121	1.156 (1.071, 1.247)	<0.001	0.003
Triglycerides to total lipids ratio in large HDL	%	4778	-0.007 (-0.021, 0.006)	0.298	0.404	1.010 (0.942, 1.084)	0.779	0.831
Triglycerides to total lipids ratio in large LDL	%	4778	-0.006 (-0.019, 0.007)	0.384	0.491	0.926 (0.856, 1.003)	0.058	0.106
Triglycerides to total lipids ratio in large VLDL	%	4778	0.007 (-0.006, 0.020)	0.3	0.404	1.044 (0.968, 1.125)	0.266	0.356
Triglycerides to total lipids ratio in medium HDL	%	4778	-0.011 (-0.025, 0.002)	0.104	0.204	1.034 (0.965, 1.109)	0.341	0.444
Triglycerides to total lipids ratio in medium LDL	%	4778	-0.003 (-0.015, 0.010)	0.703	0.768	1.069 (0.992, 1.153)	0.081	0.136
Triglycerides to total lipids ratio in medium VLDL	%	4778	0.011 (-0.002, 0.024)	0.096	0.2	1.016 (0.942, 1.097)	0.677	0.758
Triglycerides to total lipids ratio in small HDL	%	4778	-0.001 (-0.014, 0.013)	0.926	0.96	0.986 (0.918, 1.060)	0.71	0.787
Triglycerides to total lipids ratio in small LDL	%	4778	-0.009 (-0.023, 0.004)	0.175	0.285	1.086 (1.010, 1.167)	0.025	0.052
Triglycerides to total lipids ratio in small VLDL	%	4778	0.012 (-0.001, 0.025)	0.064	0.173	1.026 (0.951, 1.106)	0.505	0.601
Triglycerides to total lipids ratio in very large HDL	%	4778	-0.002 (-0.015, 0.011)	0.802	0.86	1.016 (0.942, 1.096)	0.676	0.76
Triglycerides to total lipids ratio in very large VLDL	%	4778	-0.004 (-0.018, 0.009)	0.513	0.614	1.096 (1.019, 1.179)	0.013	0.033
Triglycerides to total lipids ratio in very small VLDL	%	4778	0.006 (-0.008, 0.019)	0.418	0.522	1.063 (0.988, 1.143)	0.102	0.16
Total cholines	mmol/l	4778	-0.007 (-0.021, 0.006)	0.267	0.373	1.059 (0.984, 1.140)	0.127	0.19
Phosphatidylcholine and other cholines	mmol/l	4778	-0.010 (-0.023, 0.003)	0.141	0.242	1.096 (1.019, 1.178)	0.013	0.033
Total phosphoglycerides	mmol/l	4778	-0.002 (-0.015, 0.012)	0.806	0.859	0.952 (0.886, 1.022)	0.176	0.244
Ratio of triglycerides to phosphoglycerides		4778	0.001 (-0.012, 0.015)	0.848	0.887	1.049 (0.974, 1.129)	0.207	0.28
Albumin	signal area	4777	-0.010 (-0.023, 0.004)	0.154	0.259	1.122 (1.044, 1.206)	0.002	0.007
Creatinine	mmol/l	4778	-0.009 (-0.022, 0.004)	0.167	0.274	0.876 (0.811, 0.947)	0.001	0.004
Estimated degree of unsaturation		4746	-0.010 (-0.021, 0.002)	0.091	0.194	1.086 (0.984, 1.199)	0.102	0.161
Sphingomyelins	mmol/l	4778	0.001 (-0.012, 0.014)	0.836	0.879	0.972 (0.902, 1.047)	0.458	0.566
Models were adjusted for age, sex, region, education, household income, occupation, marital status, tea drinking habit, smoking status, alcohol intake, physical activity, self-rated health, fasting time and frequency of other 11 food groups. Sample size of analyses (n) of some metabolic markers involved was less than 4,778, since results of these metabolic markers were rejected by the quality con…

## Sheet: Supplementary File 1b
Supplementary File 1b. ORs (95% CI) for MI, IS, and ICH per SD higher log-transformed metabolic markers.
Metabolic marker	Unit	OR (95% CI) for MI	p	FDR-p	OR (95% CI) for IS	p	FDR-p	OR (95% CI) for ICH	p	FDR-p
Mean diameter for VLDL particles	nm	1.099 (0.999, 1.208)	0.052	0.084	1.112 (1.018, 1.214)	0.018	0.064	1.042 (0.959, 1.132)	0.332	1.245
Mean diameter for LDL particles	nm	0.894 (0.809, 0.989)	0.03	0.055	0.836 (0.757, 0.922)	<0.001	0.007	0.954 (0.876, 1.038)	0.275	1.585
Mean diameter for HDL particles	nm	0.856 (0.777, 0.944)	0.002	0.005	0.914 (0.833, 1.003)	0.058	0.132	0.981 (0.903, 1.065)	0.643	0.959
Concentration of chylomicrons and extremely large VLDL particles	mol/l	1.102 (0.998, 1.215)	0.054	0.086	1.085 (0.997, 1.180)	0.06	0.133	1.024 (0.944, 1.110)	0.57	1.025
Concentration of very large VLDL particles	mol/l	1.121 (1.019, 1.233)	0.019	0.037	1.116 (1.022, 1.218)	0.015	0.055	1.032 (0.950, 1.121)	0.461	1.093
Concentration of large VLDL particles	mol/l	1.174 (1.067, 1.292)	0.001	0.003	1.130 (1.035, 1.234)	0.006	0.032	1.049 (0.965, 1.140)	0.263	1.852
Concentration of medium VLDL particles	mol/l	1.196 (1.088, 1.316)	<0.001	0.001	1.148 (1.050, 1.255)	0.002	0.02	1.047 (0.962, 1.138)	0.288	1.41
Concentration of small VLDL particles	mol/l	1.246 (1.132, 1.371)	<0.001	<0.001	1.157 (1.056, 1.267)	0.002	0.017	1.044 (0.960, 1.136)	0.313	1.282
Concentration of very small VLDL particles	mol/l	1.247 (1.132, 1.374)	<0.001	<0.001	1.128 (1.026, 1.239)	0.013	0.051	1.015 (0.932, 1.105)	0.734	0.966
Concentration of IDL particles	mol/l	1.169 (1.060, 1.289)	0.002	0.005	1.092 (0.994, 1.201)	0.067	0.147	0.989 (0.908, 1.077)	0.799	0.967
Concentration of large LDL particles	mol/l	1.177 (1.067, 1.298)	0.001	0.004	1.108 (1.008, 1.217)	0.033	0.093	1.000 (0.919, 1.089)	0.996	1.001
Concentration of medium LDL particles	mol/l	1.183 (1.073, 1.304)	0.001	0.003	1.132 (1.030, 1.243)	0.01	0.045	1.014 (0.931, 1.104)	0.755	0.976
Concentration of small LDL particles	mol/l	1.195 (1.084, 1.318)	<0.001	0.002	1.153 (1.049, 1.268)	0.003	0.021	1.017 (0.934, 1.107)	0.697	0.963
Concentration of very large HDL particles	mol/l	0.940 (0.855, 1.034)	0.205	0.272	0.976 (0.892, 1.068)	0.601	0.705	0.999 (0.921, 1.084)	0.985	1.003
Concentration of large HDL particles	mol/l	0.836 (0.758, 0.923)	<0.001	0.002	0.908 (0.826, 0.997)	0.044	0.11	0.978 (0.897, 1.067)	0.617	0.984
Concentration of medium HDL particles	mol/l	0.872 (0.791, 0.961)	0.006	0.013	0.988 (0.897, 1.088)	0.804	0.854	0.968 (0.889, 1.055)	0.462	1.083
Concentration of small HDL particles	mol/l	1.020 (0.926, 1.124)	0.685	0.755	1.068 (0.971, 1.175)	0.177	0.291	1.005 (0.924, 1.092)	0.916	0.986
Total lipids in chylomicrons and extremely large VLDL	mmol/l	1.103 (1.000, 1.217)	0.049	0.081	1.086 (0.998, 1.182)	0.056	0.132	1.024 (0.945, 1.110)	0.566	1.027
Total lipids in very large VLDL	mmol/l	1.121 (1.019, 1.233)	0.019	0.036	1.116 (1.022, 1.218)	0.014	0.056	1.031 (0.949, 1.120)	0.467	1.083
Total lipids in large VLDL	mmol/l	1.173 (1.066, 1.291)	0.001	0.004	1.129 (1.034, 1.232)	0.007	0.033	1.048 (0.964, 1.139)	0.274	1.665
Total lipids in medium VLDL	mmol/l	1.196 (1.088, 1.316)	<0.001	0.001	1.147 (1.049, 1.254)	0.003	0.02	1.046 (0.962, 1.137)	0.295	1.326
Total lipids in small VLDL	mmol/l	1.250 (1.136, 1.376)	<0.001	<0.001	1.159 (1.057, 1.269)	0.002	0.017	1.044 (0.960, 1.136)	0.316	1.226
Total lipids in very small VLDL	mmol/l	1.235 (1.120, 1.360)	<0.001	<0.001	1.119 (1.018, 1.229)	0.02	0.065	1.011 (0.929, 1.102)	0.795	0.966
Total lipids in IDL	mmol/l	1.156 (1.048, 1.275)	0.004	0.009	1.089 (0.991, 1.197)	0.078	0.159	0.987 (0.906, 1.075)	0.759	0.975
Total lipids in large LDL	mmol/l	1.167 (1.058, 1.287)	0.002	0.005	1.104 (1.005, 1.213)	0.039	0.104	0.999 (0.917, 1.087)	0.976	1.012
Total lipids in medium LDL	mmol/l	1.177 (1.068, 1.298)	0.001	0.003	1.129 (1.028, 1.241)	0.011	0.048	1.013 (0.930, 1.103)	0.774	0.979
Total lipids in small LDL	mmol/l	1.187 (1.077, 1.308)	0.001	0.003	1.146 (1.043, 1.260)	0.005	0.026	1.015 (0.932, 1.106)	0.729	0.97
Total lipids in very large HDL	mmol/l	0.942 (0.856, 1.035)	0.214	0.283	0.978 (0.893, 1.070)	0.621	0.72	0.999 (0.920, 1.084)	0.977	1.009
Total lipids in large HDL	mmol/l	0.835 (0.756, 0.921)	<0.001	0.002	0.907 (0.826, 0.996)	0.042	0.107	0.977 (0.896, 1.066)	0.603	0.984
Total lipids in medium HDL	mmol/l	0.867 (0.787, 0.956)	0.004	0.01	0.987 (0.896, 1.086)	0.784	0.836	0.969 (0.890, 1.056)	0.478	1.075
Total lipids in small HDL	mmol/l	1.015 (0.922, 1.119)	0.758	0.8	1.063 (0.966, 1.169)	0.212	0.338	1.003 (0.922, 1.090)	0.95	1.004
Total cholesterol	mmol/l	1.154 (1.048, 1.271)	0.004	0.009	1.127 (1.025, 1.239)	0.014	0.055	1.002 (0.920, 1.092)	0.959	1.004
Total cholesterol in VLDL	mmol/l	1.228 (1.115, 1.354)	<0.001	<0.001	1.169 (1.063, 1.286)	0.001	0.017	1.018 (0.935, 1.110)	0.678	0.966
Total cholesterol in chylomicrons and extremely large VLDL	mmol/l	1.231 (1.119, 1.355)	<0.001	<0.001	1.167 (1.064, 1.280)	0.001	0.015	1.036 (0.952, 1.128)	0.413	1.208
Total cholesterol in very large VLDL	mmol/l	1.113 (1.008, 1.229)	0.034	0.059	1.081 (0.994, 1.176)	0.07	0.149	1.024 (0.945, 1.110)	0.556	1.025
Total cholesterol in large VLDL	mmol/l	1.097 (0.997, 1.208)	0.058	0.091	1.096 (1.005, 1.196)	0.038	0.102	1.032 (0.950, 1.120)	0.459	1.099
Total cholesterol in medium VLDL	mmol/l	1.157 (1.050, 1.275)	0.003	0.008	1.104 (1.013, 1.204)	0.025	0.08	1.039 (0.956, 1.129)	0.366	1.212
Total cholesterol in small VLDL	mmol/l	1.189 (1.081, 1.309)	<0.001	0.002	1.131 (1.035, 1.236)	0.007	0.033	1.037 (0.953, 1.128)	0.398	1.21
Total cholesterol in very small VLDL	mmol/l	1.250 (1.135, 1.377)	<0.001	<0.001	1.152 (1.049, 1.266)	0.003	0.021	1.040 (0.955, 1.132)	0.365	1.227
Total cholesterol in IDL	mmol/l	1.176 (1.065, 1.298)	0.001	0.004	1.080 (0.983, 1.187)	0.11	0.209	0.997 (0.916, 1.086)	0.951	1
Total cholesterol in LDL	mmol/l	1.128 (1.023, 1.245)	0.016	0.031	1.083 (0.986, 1.190)	0.096	0.191	0.982 (0.902, 1.069)	0.677	0.97
Total cholesterol in large LDL	mmol/l	1.144 (1.036, 1.263)	0.008	0.018	1.120 (1.016, 1.234)	0.023	0.074	0.992 (0.915, 1.076)	0.847	0.972
Total cholesterol in medium LDL	mmol/l	1.145 (1.037, 1.264)	0.007	0.016	1.102 (1.002, 1.212)	0.046	0.113	0.993 (0.914, 1.079)	0.868	0.972
Total cholesterol in small LDL	mmol/l	1.133 (1.029, 1.248)	0.011	0.024	1.109 (1.010, 1.218)	0.03	0.091	1.009 (0.927, 1.099)	0.838	0.967
Total cholesterol in HDL	mmol/l	1.128 (1.025, 1.242)	0.014	0.028	1.110 (1.011, 1.219)	0.028	0.087	1.010 (0.927, 1.099)	0.824	0.965
Total cholesterol in HDL2	mmol/l	0.864 (0.785, 0.950)	0.003	0.007	0.956 (0.871, 1.050)	0.35	0.487	0.977 (0.898, 1.064)	0.599	0.984
Total cholesterol in HDL3	mmol/l	0.842 (0.766, 0.925)	<0.001	0.002	0.948 (0.863, 1.041)	0.26	0.391	0.968 (0.889, 1.054)	0.45	1.1
Total cholesterol in very large HDL	mmol/l	1.098 (0.997, 1.208)	0.057	0.09	1.067 (0.973, 1.171)	0.17	0.285	1.060 (0.976, 1.153)	0.168	2.229
Total cholesterol in large HDL	mmol/l	0.995 (0.906, 1.092)	0.91	0.918	1.019 (0.931, 1.114)	0.689	0.767	1.011 (0.932, 1.097)	0.79	0.971
Total cholesterol in medium HDL	mmol/l	0.825 (0.748, 0.910)	<0.001	0.001	0.903 (0.822, 0.992)	0.033	0.093	0.972 (0.892, 1.060)	0.525	1.046
Total cholesterol in small HDL	mmol/l	0.848 (0.771, 0.933)	0.001	0.003	0.989 (0.899, 1.088)	0.819	0.857	0.967 (0.890, 1.051)	0.436	1.14
Remnant cholesterol (non-HDL, non-LDL -cholesterol)	mmol/l	1.040 (0.945, 1.145)	0.426	0.518	1.041 (0.951, 1.139)	0.388	0.523	1.008 (0.926, 1.097)	0.856	0.972
Esterified cholesterol	mmol/l	0.971 (0.897, 1.052)	0.47	0.556	0.995 (0.841, 1.178)	0.958	0.966	0.936 (0.696, 1.259)	0.662	0.967
Cholesterol esters in chylomicrons and extremely large VLDL	mmol/l	1.114 (1.009, 1.229)	0.033	0.058	1.080 (0.992, 1.175)	0.076	0.157	1.022 (0.943, 1.108)	0.597	0.995
Cholesterol esters in very large VLDL	mmol/l	1.088 (0.989, 1.198)	0.084	0.128	1.084 (0.994, 1.182)	0.068	0.148	1.033 (0.951, 1.122)	0.442	1.131
Cholesterol esters in large VLDL	mmol/l	1.135 (1.025, 1.257)	0.015	0.03	1.063 (0.979, 1.155)	0.147	0.253	1.047 (0.963, 1.138)	0.279	1.572
Cholesterol esters in medium VLDL	mmol/l	1.169 (1.061, 1.287)	0.002	0.005	1.114 (1.019, 1.219)	0.018	0.063	1.021 (0.938, 1.111)	0.635	0.965
Cholesterol esters in small VLDL	mmol/l	1.212 (1.100, 1.337)	<0.001	0.001	1.133 (1.030, 1.246)	0.01	0.046	1.029 (0.945, 1.121)	0.504	1.069
Cholesterol esters in very small VLDL	mmol/l	1.161 (1.051, 1.282)	0.003	0.008	1.078 (0.980, 1.186)	0.122	0.231	0.993 (0.912, 1.082)	0.878	0.978
Cholesterol esters in IDL	mmol/l	1.145 (1.038, 1.264)	0.007	0.016	1.101 (1.002, 1.210)	0.046	0.113	0.983 (0.902, 1.071)	0.696	0.967
Cholesterol esters in large LDL	mmol/l	1.173 (1.051, 1.309)	0.004	0.01	1.116 (1.008, 1.235)	0.034	0.093	0.989 (0.916, 1.068)	0.776	0.975
Cholesterol esters in medium LDL	mmol/l	1.084 (0.985, 1.193)	0.099	0.145	1.089 (0.990, 1.197)	0.079	0.159	1.004 (0.926, 1.089)	0.916	0.982
Cholesterol esters in small LDL	mmol/l	1.071 (0.975, 1.177)	0.154	0.21	1.081 (0.983, 1.189)	0.106	0.205	1.004 (0.926, 1.088)	0.921	0.982
Cholesterol esters in very large HDL	mmol/l	1.017 (0.926, 1.116)	0.73	0.786	1.036 (0.947, 1.133)	0.44	0.569	1.020 (0.941, 1.106)	0.633	0.968
Cholesterol esters in large HDL	mmol/l	0.823 (0.746, 0.908)	<0.001	0.001	0.902 (0.821, 0.991)	0.031	0.092	0.973 (0.892, 1.061)	0.537	1.043
Cholesterol esters in medium HDL	mmol/l	0.847 (0.770, 0.931)	0.001	0.003	0.993 (0.903, 1.092)	0.888	0.912	0.966 (0.889, 1.049)	0.41	1.229
Cholesterol esters in small HDL	mmol/l	1.024 (0.924, 1.134)	0.65	0.728	1.029 (0.941, 1.126)	0.527	0.638	0.985 (0.908, 1.070)	0.725	0.971
Free cholesterol	mmol/l	1.117 (1.017, 1.227)	0.021	0.039	1.160 (1.053, 1.278)	0.003	0.019	0.988 (0.906, 1.077)	0.783	0.979
Free cholesterol in chylomicrons and extremely large VLDL	mmol/l	1.093 (0.992, 1.205)	0.072	0.112	1.089 (1.001, 1.186)	0.047	0.115	1.028 (0.948, 1.114)	0.502	1.076
Free cholesterol in very large VLDL	mmol/l	1.077 (0.979, 1.186)	0.129	0.183	1.097 (1.007, 1.196)	0.035	0.095	1.027 (0.947, 1.115)	0.52	1.045
Free cholesterol in large VLDL	mmol/l	1.156 (1.048, 1.274)	0.004	0.009	1.111 (1.020, 1.210)	0.016	0.056	1.053 (0.969, 1.143)	0.223	2.276
Free cholesterol in medium VLDL	mmol/l	1.199 (1.089, 1.319)	<0.001	0.001	1.139 (1.043, 1.244)	0.004	0.023	1.050 (0.966, 1.142)	0.249	2.239
Free cholesterol in small VLDL	mmol/l	1.259 (1.144, 1.385)	<0.001	<0.001	1.152 (1.051, 1.262)	0.002	0.021	1.045 (0.961, 1.136)	0.305	1.271
Free cholesterol in very small VLDL	mmol/l	1.193 (1.079, 1.320)	0.001	0.003	1.073 (0.979, 1.175)	0.131	0.24	1.004 (0.925, 1.089)	0.93	0.987
Free cholesterol in IDL	mmol/l	1.081 (0.980, 1.192)	0.119	0.172	1.039 (0.947, 1.139)	0.421	0.557	0.977 (0.900, 1.061)	0.583	1.008
Free cholesterol in large LDL	mmol/l	1.109 (1.005, 1.222)	0.039	0.067	1.059 (0.965, 1.163)	0.226	0.35	0.983 (0.904, 1.069)	0.695	0.971
Free cholesterol in medium LDL	mmol/l	1.175 (1.066, 1.295)	0.001	0.004	1.119 (1.018, 1.230)	0.019	0.065	1.005 (0.923, 1.096)	0.901	0.993
Free cholesterol in small LDL	mmol/l	1.181 (1.072, 1.301)	0.001	0.003	1.130 (1.028, 1.242)	0.012	0.048	1.012 (0.929, 1.101)	0.79	0.966
Free cholesterol in very large HDL	mmol/l	0.943 (0.859, 1.036)	0.223	0.292	0.978 (0.893, 1.070)	0.625	0.721	0.991 (0.913, 1.076)	0.826	0.958
Free cholesterol in large HDL	mmol/l	0.844 (0.766, 0.931)	0.001	0.003	0.914 (0.833, 1.003)	0.059	0.132	0.971 (0.893, 1.055)	0.486	1.062
Free cholesterol in medium HDL	mmol/l	0.862 (0.784, 0.949)	0.002	0.006	0.973 (0.885, 1.071)	0.578	0.688	0.975 (0.895, 1.061)	0.555	1.041
Free cholesterol in small HDL	mmol/l	0.953 (0.865, 1.050)	0.333	0.41	1.021 (0.927, 1.125)	0.675	0.756	0.999 (0.919, 1.086)	0.983	1.005
Total triglycerides	mmol/l	1.210 (1.101, 1.331)	<0.001	0.001	1.147 (1.049, 1.253)	0.003	0.019	1.051 (0.966, 1.143)	0.249	2.154
Triglycerides in VLDL	mmol/l	1.193 (1.085, 1.312)	<0.001	0.002	1.150 (1.051, 1.257)	0.002	0.02	1.049 (0.964, 1.140)	0.266	1.712
Triglycerides in chylomicrons and extremely large VLDL	mmol/l	1.093 (0.991, 1.207)	0.076	0.118	1.072 (0.987, 1.166)	0.1	0.196	1.023 (0.945, 1.109)	0.57	1.017
Triglycerides in very large VLDL	mmol/l	1.120 (1.018, 1.232)	0.02	0.037	1.116 (1.022, 1.218)	0.015	0.055	1.033 (0.950, 1.122)	0.449	1.123
Triglycerides in large VLDL	mmol/l	1.176 (1.069, 1.294)	0.001	0.003	1.135 (1.039, 1.239)	0.005	0.027	1.053 (0.968, 1.144)	0.228	2.229
Triglycerides in medium VLDL	mmol/l	1.195 (1.087, 1.315)	<0.001	0.001	1.150 (1.052, 1.257)	0.002	0.02	1.050 (0.966, 1.142)	0.254	2.114
Triglycerides in small VLDL	mmol/l	1.226 (1.114, 1.349)	<0.001	<0.001	1.144 (1.046, 1.251)	0.003	0.021	1.047 (0.963, 1.139)	0.281	1.503
Triglycerides in very small VLDL	mmol/l	1.258 (1.144, 1.384)	<0.001	<0.001	1.124 (1.026, 1.230)	0.012	0.048	1.033 (0.950, 1.124)	0.448	1.134
Triglycerides in IDL	mmol/l	1.275 (1.158, 1.405)	<0.001	<0.001	1.081 (0.986, 1.185)	0.098	0.193	1.025 (0.944, 1.113)	0.56	1.024
Triglycerides in LDL	mmol/l	1.273 (1.155, 1.403)	<0.001	<0.001	1.091 (0.995, 1.196)	0.065	0.144	1.037 (0.954, 1.127)	0.396	1.221
Triglycerides in large LDL	mmol/l	1.276 (1.156, 1.409)	<0.001	<0.001	1.070 (0.975, 1.174)	0.155	0.263	1.023 (0.942, 1.110)	0.597	1.002
Triglycerides in medium LDL	mmol/l	1.261 (1.144, 1.389)	<0.001	<0.001	1.108 (1.010, 1.215)	0.03	0.09	1.039 (0.959, 1.127)	0.351	1.216
Triglycerides in small LDL	mmol/l	1.274 (1.157, 1.403)	<0.001	<0.001	1.168 (1.065, 1.280)	0.001	0.014	1.049 (0.966, 1.138)	0.255	2.051
Triglycerides in HDL	mmol/l	1.120 (1.016, 1.235)	0.023	0.042	1.042 (0.951, 1.141)	0.379	0.514	1.026 (0.942, 1.118)	0.553	1.045
Triglycerides in very large HDL	mmol/l	1.129 (1.021, 1.249)	0.018	0.036	1.051 (0.960, 1.151)	0.281	0.405	1.048 (0.962, 1.142)	0.28	1.537
Triglycerides in large HDL	mmol/l	1.013 (0.909, 1.128)	0.82	0.854	0.939 (0.855, 1.032)	0.194	0.316	1.022 (0.936, 1.117)	0.624	0.982
Triglycerides in medium HDL	mmol/l	1.082 (0.984, 1.189)	0.104	0.151	1.058 (0.967, 1.158)	0.219	0.345	0.985 (0.905, 1.072)	0.723	0.974
Triglycerides in small HDL	mmol/l	1.174 (1.068, 1.291)	0.001	0.003	1.085 (0.992, 1.186)	0.073	0.154	1.018 (0.938, 1.106)	0.664	0.964
Phospholipids in chylomicrons and extremely large VLDL	mmol/l	1.047 (0.954, 1.149)	0.338	0.413	1.099 (0.997, 1.211)	0.057	0.132	0.987 (0.905, 1.077)	0.773	0.983
Phospholipids in very large VLDL	mmol/l	1.098 (1.000, 1.206)	0.05	0.081	1.158 (1.052, 1.275)	0.003	0.019	1.040 (0.957, 1.131)	0.355	1.209
Phospholipids in large VLDL	mmol/l	1.083 (0.987, 1.189)	0.09	0.136	1.156 (1.049, 1.274)	0.004	0.022	1.038 (0.955, 1.128)	0.379	1.2
Phospholipids in medium VLDL	mmol/l	1.056 (0.964, 1.158)	0.242	0.315	1.122 (1.019, 1.236)	0.019	0.065	1.012 (0.932, 1.100)	0.77	0.985
Phospholipids in small VLDL	mmol/l	1.094 (0.992, 1.206)	0.071	0.111	1.090 (1.001, 1.186)	0.048	0.114	1.023 (0.944, 1.108)	0.579	1.018
Phospholipids in very small VLDL	mmol/l	1.088 (0.988, 1.198)	0.086	0.13	1.095 (1.004, 1.194)	0.04	0.105	1.027 (0.947, 1.115)	0.518	1.05
Phospholipids in IDL	mmol/l	1.176 (1.068, 1.295)	0.001	0.003	1.128 (1.033, 1.231)	0.007	0.033	1.049 (0.965, 1.140)	0.261	2.025
Phospholipids in large LDL	mmol/l	1.200 (1.091, 1.320)	<0.001	0.001	1.148 (1.050, 1.255)	0.002	0.021	1.044 (0.960, 1.135)	0.315	1.266
Phospholipids in medium LDL	mmol/l	1.236 (1.123, 1.360)	<0.001	<0.001	1.144 (1.044, 1.253)	0.004	0.024	1.031 (0.948, 1.121)	0.478	1.066
Phospholipids in small LDL	mmol/l	1.181 (1.070, 1.304)	0.001	0.003	1.095 (0.997, 1.202)	0.057	0.133	0.995 (0.916, 1.082)	0.912	0.992
Phospholipids in very large HDL	mmol/l	1.130 (1.025, 1.245)	0.014	0.028	1.067 (0.972, 1.172)	0.171	0.284	0.983 (0.902, 1.071)	0.689	0.969
Phospholipids in large HDL	mmol/l	1.169 (1.061, 1.289)	0.002	0.005	1.113 (1.012, 1.223)	0.028	0.087	0.992 (0.910, 1.082)	0.864	0.972
Phospholipids in medium HDL	mmol/l	1.220 (1.106, 1.345)	<0.001	0.001	1.166 (1.059, 1.284)	0.002	0.017	1.005 (0.922, 1.095)	0.905	0.994
Phospholipids in small HDL	mmol/l	1.214 (1.102, 1.339)	<0.001	0.001	1.176 (1.067, 1.295)	0.001	0.014	1.008 (0.926, 1.098)	0.853	0.975
Apolipoprotein A-I	g/l	0.892 (0.811, 0.981)	0.019	0.036	0.943 (0.861, 1.033)	0.205	0.332	0.985 (0.907, 1.070)	0.718	0.973
Apolipoprotein B	g/l	0.844 (0.765, 0.931)	0.001	0.003	0.918 (0.836, 1.008)	0.074	0.154	0.979 (0.899, 1.068)	0.636	0.961
Ratio of apolipoprotein B to apolipoprotein A-I		0.883 (0.801, 0.974)	0.013	0.028	0.978 (0.888, 1.077)	0.655	0.744	0.979 (0.897, 1.068)	0.629	0.975
Total fatty acids	mmol/l	0.948 (0.860, 1.043)	0.273	0.35	1.028 (0.935, 1.130)	0.572	0.684	0.990 (0.911, 1.075)	0.806	0.96
Saturated fatty acids	mmol/l	0.967 (0.878, 1.065)	0.493	0.581	1.039 (0.945, 1.143)	0.429	0.558	1.011 (0.929, 1.100)	0.801	0.964
Monounsaturated fatty acids; 16:1, 18:1	mmol/l	1.261 (1.145, 1.389)	<0.001	<0.001	1.209 (1.099, 1.332)	<0.001	0.004	1.032 (0.946, 1.125)	0.483	1.066
Polyunsaturated fatty acids	mmol/l	1.276 (1.158, 1.406)	<0.001	<0.001	1.183 (1.075, 1.303)	0.001	0.009	1.027 (0.941, 1.120)	0.555	1.033
Omega-3 fatty acids	mmol/l	1.161 (1.057, 1.276)	0.002	0.005	1.234 (1.121, 1.358)	<0.001	0.001	1.035 (0.951, 1.127)	0.426	1.142
22:6, docosahexaenoic acid	mmol/l	1.143 (1.042, 1.254)	0.005	0.011	1.202 (1.094, 1.322)	<0.001	0.004	1.024 (0.940, 1.115)	0.588	1.01
Omega-6 fatty acids	mmol/l	1.188 (1.082, 1.305)	<0.001	0.002	1.195 (1.089, 1.313)	<0.001	0.005	1.042 (0.958, 1.134)	0.339	1.229
18:2, linoleic acid	mmol/l	1.129 (1.026, 1.242)	0.013	0.027	1.286 (1.162, 1.425)	<0.001	<0.001	1.037 (0.950, 1.131)	0.416	1.2
Ratio of saturated fatty acids to total fatty acids	%	1.165 (1.058, 1.283)	0.002	0.005	1.208 (1.093, 1.334)	<0.001	0.005	0.980 (0.898, 1.070)	0.648	0.959
Ratio of monounsaturated fatty acids to total fatty acids	%	1.204 (1.096, 1.322)	<0.001	0.001	1.173 (1.063, 1.294)	0.002	0.018	0.995 (0.913, 1.084)	0.906	0.99
Ratio of polyunsaturated fatty acids to total fatty acids	%	1.116 (1.015, 1.227)	0.023	0.042	1.289 (1.163, 1.428)	<0.001	<0.001	1.047 (0.960, 1.141)	0.3	1.298
Ratio of omega-3 fatty acids to total fatty acids	%	0.950 (0.866, 1.043)	0.284	0.358	1.153 (0.952, 1.396)	0.146	0.253	0.980 (0.898, 1.069)	0.642	0.963
Ratio of 22:6 docosahexaenoic acid to total fatty acids	%	0.908 (0.826, 0.998)	0.045	0.075	0.877 (0.799, 0.962)	0.005	0.028	0.970 (0.883, 1.064)	0.516	1.065
Ratio of omega-6 fatty acids to total fatty acids	%	1.154 (1.049, 1.270)	0.003	0.008	1.007 (0.918, 1.105)	0.877	0.905	1.050 (0.964, 1.144)	0.263	1.911
Ratio of 18:2 linoleic acid to total fatty acids	%	0.934 (0.848, 1.028)	0.163	0.221	1.059 (0.965, 1.163)	0.223	0.349	1.020 (0.934, 1.115)	0.657	0.966
Alanine	mmol/l	1.054 (0.957, 1.160)	0.284	0.358	1.022 (0.927, 1.128)	0.661	0.744	0.929 (0.850, 1.015)	0.101	1.902
Glutamine	mmol/l	1.049 (0.960, 1.147)	0.287	0.359	0.935 (0.856, 1.021)	0.134	0.243	0.966 (0.888, 1.051)	0.423	1.146
Histidine	mmol/l	0.927 (0.844, 1.018)	0.114	0.166	1.048 (0.958, 1.146)	0.31	0.439	1.048 (0.960, 1.145)	0.293	1.347
Isoleucine	mmol/l	0.936 (0.856, 1.024)	0.149	0.206	0.984 (0.900, 1.077)	0.73	0.797	1.013 (0.924, 1.110)	0.786	0.977
Leucine	mmol/l	1.014 (0.922, 1.116)	0.772	0.812	1.022 (0.937, 1.115)	0.617	0.719	0.972 (0.896, 1.055)	0.499	1.08
Phenylalanine	mmol/l	0.905 (0.820, 0.998)	0.045	0.075	0.967 (0.880, 1.062)	0.482	0.602	0.970 (0.892, 1.054)	0.467	1.073
Tyrosine	mmol/l	0.978 (0.890, 1.075)	0.651	0.725	1.032 (0.947, 1.126)	0.47	0.591	1.037 (0.958, 1.123)	0.366	1.195
Valine	mmol/l	1.018 (0.923, 1.122)	0.727	0.786	1.042 (0.952, 1.141)	0.374	0.51	0.955 (0.877, 1.040)	0.292	1.368
Citrate	mmol/l	1.031 (0.932, 1.141)	0.557	0.639	1.036 (0.943, 1.139)	0.463	0.585	0.926 (0.849, 1.008)	0.077	1.734
Glucose	mmol/l	1.065 (0.963, 1.177)	0.222	0.292	0.947 (0.861, 1.042)	0.262	0.39	1.089 (1.003, 1.184)	0.043	1.397
Lactate	mmol/l	0.971 (0.880, 1.071)	0.556	0.642	0.989 (0.902, 1.084)	0.809	0.854	1.034 (0.953, 1.122)	0.419	1.163
Glycoprotein acetyls, mainly a1-acid glycoprotein	mmol/l	0.994 (0.900, 1.098)	0.908	0.92	1.031 (0.940, 1.131)	0.518	0.63	0.901 (0.829, 0.979)	0.014	0.646
Acetoacetate	mmol/l	0.964 (0.875, 1.061)	0.452	0.541	0.917 (0.836, 1.007)	0.07	0.148	0.955 (0.879, 1.037)	0.273	1.708
Acetate	mmol/l	1.320 (1.197, 1.456)	<0.001	<0.001	1.198 (1.085, 1.323)	<0.001	0.006	1.310 (1.193, 1.439)	<0.001	<0.001
3-hydroxybutyrate	mmol/l	1.091 (0.987, 1.205)	0.089	0.134	1.005 (0.917, 1.101)	0.922	0.943	1.010 (0.928, 1.098)	0.826	0.962
Cholesterol esters to total lipids ratio in IDL	%	1.343 (1.215, 1.486)	<0.001	<0.001	1.289 (1.173, 1.418)	<0.001	<0.001	1.170 (1.070, 1.279)	0.001	0.062
Cholesterol esters to total lipids ratio in chylomicrons and extremely large VLDL	%	0.936 (0.848, 1.033)	0.189	0.255	1.245 (1.128, 1.374)	<0.001	0.001	1.052 (0.963, 1.149)	0.263	1.972
Cholesterol esters to total lipids ratio in large HDL	%	1.021 (0.922, 1.131)	0.687	0.754	0.958 (0.863, 1.064)	0.421	0.553	1.024 (0.942, 1.113)	0.58	1.011
Cholesterol esters to total lipids ratio in large LDL	%	1.214 (1.088, 1.356)	0.001	0.003	1.140 (1.031, 1.260)	0.011	0.046	1.090 (0.992, 1.198)	0.072	1.81
Cholesterol esters to total lipids ratio in large VLDL	%	1.025 (0.929, 1.131)	0.622	0.7	1.120 (1.020, 1.229)	0.017	0.061	0.962 (0.888, 1.043)	0.351	1.234
Cholesterol esters to total lipids ratio in medium HDL	%	1.104 (1.000, 1.218)	0.05	0.081	1.045 (0.961, 1.137)	0.304	0.432	1.020 (0.942, 1.104)	0.632	0.974
Cholesterol esters to total lipids ratio in medium LDL	%	0.809 (0.736, 0.889)	<0.001	<0.001	0.903 (0.822, 0.992)	0.033	0.094	0.958 (0.879, 1.044)	0.326	1.242
Cholesterol esters to total lipids ratio in medium VLDL	%	1.152 (0.977, 1.359)	0.093	0.139	1.112 (0.972, 1.273)	0.123	0.231	0.983 (0.919, 1.053)	0.628	0.982
Cholesterol esters to total lipids ratio in small HDL	%	1.029 (0.934, 1.134)	0.565	0.645	0.987 (0.913, 1.068)	0.754	0.815	1.033 (0.951, 1.122)	0.44	1.138
Cholesterol esters to total lipids ratio in small LDL	%	0.851 (0.772, 0.939)	0.001	0.004	1.010 (0.922, 1.107)	0.824	0.858	0.971 (0.897, 1.050)	0.458	1.107
Cholesterol esters to total lipids ratio in small VLDL	%	1.021 (0.931, 1.120)	0.657	0.728	1.052 (0.957, 1.156)	0.297	0.426	1.000 (0.925, 1.082)	0.996	1.005
Cholesterol esters to total lipids ratio in very large HDL	%	0.948 (0.858, 1.047)	0.293	0.364	0.931 (0.846, 1.024)	0.142	0.252	0.942 (0.864, 1.028)	0.18	2.131
Cholesterol esters to total lipids ratio in very large VLDL	%	1.020 (0.921, 1.130)	0.7	0.765	1.013 (0.926, 1.110)	0.772	0.831	0.983 (0.906, 1.067)	0.686	0.971
Cholesterol esters to total lipids ratio in very small VLDL	%	1.016 (0.927, 1.113)	0.74	0.79	1.040 (0.947, 1.142)	0.414	0.551	1.000 (0.924, 1.082)	0.997	0.997
Free cholesterol to total lipids ratio in IDL	%	0.991 (0.900, 1.092)	0.861	0.889	0.978 (0.892, 1.072)	0.63	0.723	0.990 (0.911, 1.076)	0.81	0.954
Free cholesterol to total lipids ratio in chylomicrons and extremely large VLDL	%	1.254 (1.136, 1.384)	<0.001	<0.001	1.192 (1.083, 1.312)	<0.001	0.006	1.068 (0.979, 1.164)	0.139	2.092
Free cholesterol to total lipids ratio in large HDL	%	0.992 (0.903, 1.089)	0.862	0.886	1.004 (0.922, 1.093)	0.934	0.951	1.026 (0.947, 1.112)	0.529	1.044
Free cholesterol to total lipids ratio in large LDL	%	0.886 (0.804, 0.976)	0.015	0.03	0.931 (0.847, 1.024)	0.143	0.251	0.952 (0.874, 1.037)	0.264	1.797
Free cholesterol to total lipids ratio in large VLDL	%	0.949 (0.857, 1.051)	0.314	0.389	0.967 (0.880, 1.063)	0.486	0.6	0.964 (0.892, 1.042)	0.35	1.251
Free cholesterol to total lipids ratio in medium HDL	%	1.076 (0.976, 1.187)	0.141	0.196	1.065 (0.980, 1.157)	0.135	0.243	1.033 (0.955, 1.119)	0.418	1.19
Free cholesterol to total lipids ratio in medium LDL	%	0.897 (0.813, 0.990)	0.031	0.055	0.950 (0.865, 1.043)	0.279	0.404	0.969 (0.900, 1.044)	0.413	1.223
Free cholesterol to total lipids ratio in medium VLDL	%	0.843 (0.762, 0.932)	0.001	0.003	0.870 (0.789, 0.959)	0.005	0.028	0.943 (0.869, 1.023)	0.16	2.253
Free cholesterol to total lipids ratio in small HDL	%	1.108 (1.002, 1.224)	0.046	0.075	1.073 (0.988, 1.164)	0.093	0.187	1.056 (0.973, 1.146)	0.193	2.173
Free cholesterol to total lipids ratio in small LDL	%	0.873 (0.794, 0.960)	0.005	0.011	0.949 (0.866, 1.040)	0.263	0.386	0.984 (0.905, 1.071)	0.715	0.975
Free cholesterol to total lipids ratio in small VLDL	%	0.879 (0.797, 0.969)	0.009	0.021	0.899 (0.819, 0.987)	0.025	0.08	0.986 (0.906, 1.073)	0.745	0.969
Free cholesterol to total lipids ratio in very large HDL	%	1.191 (1.075, 1.319)	0.001	0.003	1.091 (1.002, 1.187)	0.044	0.109	1.067 (0.983, 1.159)	0.123	2.124
Free cholesterol to total lipids ratio in very large VLDL	%	0.883 (0.800, 0.975)	0.014	0.028	0.940 (0.853, 1.037)	0.219	0.347	0.989 (0.906, 1.079)	0.807	0.955
Free cholesterol to total lipids ratio in very small VLDL	%	0.887 (0.805, 0.977)	0.015	0.031	0.883 (0.803, 0.971)	0.01	0.045	0.990 (0.910, 1.076)	0.806	0.964
Phospholipids to total lipds ratio in IDL	%	1.040 (0.942, 1.147)	0.438	0.528	0.946 (0.864, 1.037)	0.237	0.364	1.006 (0.926, 1.092)	0.889	0.986
Phospholipids to total lipds ratio in chylomicrons and extremely large VLDL	%	0.977 (0.893, 1.069)	0.608	0.687	0.985 (0.898, 1.079)	0.742	0.807	0.957 (0.879, 1.043)	0.316	1.246
Phospholipids to total lipds ratio in large HDL	%	1.032 (0.938, 1.135)	0.516	0.602	1.073 (0.986, 1.168)	0.104	0.202	1.021 (0.942, 1.107)	0.607	0.982
Phospholipids to total lipds ratio in large LDL	%	1.007 (0.903, 1.123)	0.9	0.916	0.976 (0.894, 1.065)	0.586	0.693	0.984 (0.913, 1.061)	0.674	0.972
Phospholipids to total lipds ratio in large VLDL	%	0.843 (0.763, 0.931)	0.001	0.003	0.900 (0.819, 0.990)	0.03	0.09	0.945 (0.871, 1.025)	0.171	2.137
Phospholipids to total lipds ratio in medium HDL	%	1.076 (0.976, 1.186)	0.141	0.197	1.065 (0.980, 1.157)	0.139	0.248	1.023 (0.946, 1.106)	0.571	1.011
Phospholipids to total lipds ratio in medium LDL	%	1.197 (1.082, 1.324)	<0.001	0.002	1.135 (1.032, 1.248)	0.009	0.041	1.029 (0.946, 1.118)	0.508	1.067
Phospholipids to total lipds ratio in medium VLDL	%	0.884 (0.804, 0.972)	0.011	0.023	0.932 (0.851, 1.021)	0.129	0.24	0.955 (0.879, 1.039)	0.285	1.426
Phospholipids to total lipds ratio in small HDL	%	1.161 (1.048, 1.288)	0.004	0.01	1.091 (1.003, 1.186)	0.041	0.107	1.048 (0.965, 1.137)	0.266	1.762
Phospholipids to total lipds ratio in small LDL	%	1.182 (1.070, 1.306)	0.001	0.003	0.955 (0.865, 1.053)	0.355	0.49	1.052 (0.971, 1.140)	0.212	2.27
Phospholipids to total lipds ratio in small VLDL	%	0.949 (0.863, 1.043)	0.276	0.351	0.967 (0.884, 1.058)	0.462	0.587	0.986 (0.906, 1.073)	0.738	0.965
Phospholipids to total lipds ratio in very large HDL	%	0.993 (0.905, 1.091)	0.889	0.909	0.960 (0.878, 1.048)	0.361	0.496	0.939 (0.865, 1.020)	0.137	2.194
Phospholipids to total lipds ratio in very large VLDL	%	0.893 (0.811, 0.983)	0.021	0.039	0.969 (0.884, 1.062)	0.499	0.611	0.973 (0.893, 1.061)	0.539	1.029
Phospholipids to total lipds ratio in very small VLDL	%	0.933 (0.849, 1.026)	0.151	0.207	0.947 (0.864, 1.037)	0.238	0.362	0.988 (0.908, 1.076)	0.786	0.972
Total cholesterol to total lipids ratio in IDL	%	0.824 (0.746, 0.910)	<0.001	0.001	0.839 (0.765, 0.921)	<0.001	0.005	0.905 (0.831, 0.985)	0.021	0.797
Total cholesterol to total lipids ratio in chylomicrons and extremely large VLDL	%	0.831 (0.755, 0.915)	<0.001	0.001	0.890 (0.810, 0.978)	0.015	0.056	0.961 (0.883, 1.047)	0.367	1.179
Total cholesterol to total lipids ratio in large HDL	%	1.028 (0.935, 1.131)	0.567	0.644	1.053 (0.967, 1.145)	0.234	0.36	1.022 (0.943, 1.108)	0.59	1.005
Total cholesterol to total lipids ratio in large LDL	%	0.997 (0.902, 1.102)	0.957	0.957	1.011 (0.923, 1.107)	0.816	0.858	0.969 (0.897, 1.047)	0.422	1.157
Total cholesterol to total lipids ratio in large VLDL	%	0.966 (0.876, 1.066)	0.495	0.58	1.056 (0.959, 1.162)	0.267	0.39	0.958 (0.885, 1.036)	0.282	1.478
Total cholesterol to total lipids ratio in medium HDL	%	1.111 (1.005, 1.227)	0.039	0.067	1.049 (0.965, 1.140)	0.262	0.388	1.025 (0.947, 1.110)	0.538	1.034
Total cholesterol to total lipids ratio in medium LDL	%	0.816 (0.743, 0.897)	<0.001	<0.001	0.902 (0.821, 0.991)	0.032	0.092	0.956 (0.878, 1.040)	0.291	1.393
Total cholesterol to total lipids ratio in medium VLDL	%	1.042 (0.940, 1.155)	0.438	0.53	1.073 (0.969, 1.188)	0.176	0.29	0.980 (0.909, 1.056)	0.59	0.998
Total cholesterol to total lipids ratio in small HDL	%	1.060 (0.959, 1.171)	0.252	0.326	1.012 (0.933, 1.096)	0.78	0.836	1.022 (0.942, 1.110)	0.599	0.991
Total cholesterol to total lipids ratio in small LDL	%	0.844 (0.767, 0.928)	<0.001	0.002	0.997 (0.910, 1.093)	0.956	0.969	0.971 (0.897, 1.051)	0.468	1.063
Total cholesterol to total lipids ratio in small VLDL	%	1.017 (0.926, 1.118)	0.723	0.785	1.049 (0.955, 1.151)	0.317	0.445	1.002 (0.922, 1.087)	0.971	1.011
Total cholesterol to total lipids ratio in very large HDL	%	1.017 (0.921, 1.124)	0.733	0.786	0.979 (0.894, 1.072)	0.644	0.735	0.973 (0.894, 1.058)	0.517	1.057
Total cholesterol to total lipids ratio in very large VLDL	%	1.037 (0.942, 1.142)	0.456	0.542	1.010 (0.922, 1.106)	0.833	0.864	1.005 (0.923, 1.093)	0.913	0.987
Total cholesterol to total lipids ratio in very small VLDL	%	1.016 (0.925, 1.116)	0.746	0.792	1.034 (0.942, 1.134)	0.485	0.603	1.001 (0.921, 1.088)	0.981	1.008
Triglycerides to total lipids ratio in IDL	%	0.995 (0.904, 1.096)	0.923	0.927	0.972 (0.888, 1.064)	0.539	0.648	0.993 (0.913, 1.080)	0.861	0.973
Triglycerides to total lipids ratio in chylomicrons and extremely large VLDL	%	1.216 (1.103, 1.341)	<0.001	0.001	1.166 (1.060, 1.283)	0.002	0.018	1.049 (0.963, 1.144)	0.274	1.623
Triglycerides to total lipids ratio in large HDL	%	1.012 (0.921, 1.113)	0.804	0.841	1.030 (0.946, 1.121)	0.495	0.608	1.027 (0.947, 1.114)	0.514	1.07
Triglycerides to total lipids ratio in large LDL	%	0.901 (0.816, 0.994)	0.037	0.065	0.929 (0.845, 1.022)	0.129	0.238	0.957 (0.880, 1.040)	0.297	1.309
Triglycerides to total lipids ratio in large VLDL	%	1.106 (1.004, 1.217)	0.041	0.069	1.000 (0.912, 1.096)	0.998	0.998	1.027 (0.944, 1.118)	0.532	1.04
Triglycerides to total lipids ratio in medium HDL	%	1.057 (0.959, 1.165)	0.262	0.337	1.036 (0.955, 1.124)	0.395	0.529	1.020 (0.943, 1.103)	0.616	0.99
Triglycerides to total lipids ratio in medium LDL	%	1.185 (1.069, 1.314)	0.001	0.004	0.999 (0.913, 1.093)	0.984	0.988	1.047 (0.959, 1.142)	0.305	1.295
Triglycerides to total lipids ratio in medium VLDL	%	1.079 (0.979, 1.190)	0.124	0.176	0.965 (0.879, 1.060)	0.461	0.589	1.015 (0.932, 1.105)	0.73	0.966
Triglycerides to total lipids ratio in small HDL	%	0.970 (0.881, 1.069)	0.543	0.629	0.977 (0.896, 1.065)	0.595	0.701	1.078 (0.993, 1.170)	0.072	2.017
Triglycerides to total lipids ratio in small LDL	%	1.163 (1.059, 1.277)	0.002	0.005	1.060 (0.969, 1.159)	0.205	0.33	0.999 (0.919, 1.087)	0.987	1
Triglycerides to total lipids ratio in small VLDL	%	1.075 (0.977, 1.184)	0.139	0.196	0.984 (0.896, 1.079)	0.727	0.797	1.033 (0.950, 1.123)	0.45	1.112
Triglycerides to total lipids ratio in very large HDL	%	0.989 (0.895, 1.092)	0.82	0.85	1.017 (0.927, 1.116)	0.717	0.791	1.035 (0.951, 1.126)	0.429	1.136
Triglycerides to total lipids ratio in very large VLDL	%	1.171 (1.065, 1.287)	0.001	0.004	1.066 (0.975, 1.165)	0.158	0.268	1.016 (0.935, 1.104)	0.706	0.968
Triglycerides to total lipids ratio in very small VLDL	%	1.106 (1.007, 1.215)	0.035	0.061	1.044 (0.955, 1.141)	0.341	0.476	1.042 (0.958, 1.133)	0.335	1.236
Total cholines	mmol/l	1.065 (0.967, 1.173)	0.201	0.269	1.054 (0.964, 1.152)	0.249	0.376	1.035 (0.952, 1.127)	0.418	1.177
Phosphatidylcholine and other cholines	mmol/l	1.172 (1.065, 1.289)	0.001	0.004	1.068 (0.978, 1.166)	0.143	0.25	1.052 (0.967, 1.145)	0.238	2.229
Total phosphoglycerides	mmol/l	0.928 (0.845, 1.020)	0.121	0.173	0.966 (0.887, 1.051)	0.421	0.551	1.036 (0.957, 1.122)	0.385	1.203
Ratio of triglycerides to phosphoglycerides		1.085 (0.986, 1.194)	0.096	0.142	1.036 (0.947, 1.132)	0.442	0.568	1.022 (0.939, 1.112)	0.619	0.981
Albumin	signal area	1.160 (1.055, 1.274)	0.002	0.006	1.137 (1.041, 1.242)	0.004	0.026	1.047 (0.963, 1.139)	0.284	1.451
Creatinine	mmol/l	0.871 (0.789, 0.961)	0.006	0.013	0.913 (0.833, 1.002)	0.055	0.13	0.870 (0.799, 0.947)	0.001	0.097
Estimated degree of unsaturation		1.228 (1.082, 1.395)	0.002	0.005	0.971 (0.852, 1.106)	0.656	0.742	1.176 (1.063, 1.301)	0.002	0.093
Sphingomyelins	mmol/l	0.903 (0.823, 0.991)	0.031	0.055	1.019 (0.929, 1.117)	0.694	0.769	0.924 (0.843, 1.013)	0.092	1.89
Models were adjusted for age, sex, region, education, household income, occupation, marital status, tea drinking habit, smoking status, alcohol intake, physical activity, self-rated health, fasting time and frequency of 12 food groups.
