# Supplementary material for: Association of egg consumption, metabolic markers, and risk of cardiovascular diseases: A nested case-control study
Source: eLife. 2022 May 24;11:e72909. doi: 10.7554/eLife.72909 (PMC9129873; doi:10.7554/eLife.72909)
Supplement: Supplementary file 2. [file elife-72909-supp2.xlsx]

## Sheet: Sheet1
Members of the China Kadoorie Biobank collaborative group
International Steering Committee	Junshi	Chen
	Zhengming	Chen
	Robert	Clarke
	Rory	Collins
	Yu	Guo
	Liming	Li
	Jun	Lv
	Richard	Peto
	Robin	Walters
International Co-ordinating Centre, Oxford	Daniel	Avery
	Ruth	Boxall
	Derrick	Bennett
	Yumei	Chang
	Yiping	Chen
	Zhengming	Chen
	Robert	Clarke
	Huaidong	Du
	Simon	Gilbert
	Alex	Hacker
	Mike	Hill
	Michael	Holmes
	Andri	Iona
	Christiana	Kartsonaki
	Rene	Kerosi
	Ling	Kong
	Om	Kurmi
	Garry	Lancaster
	Sarah	Lewington
	Kuang	Lin
	John	McDonnell
	Iona	Millwood
	Qunhua	Nie
	Jayakrishnan	Radhakrishnan
	Paul	Ryder
	Sam	Sansome
	Dan	Schmidt
	Paul	Sherliker
	Rajani	Sohoni
	Becky	Stevens
	Iain	Turnbull
	Robin	Walters
	Jenny	Wang
	Lin	Wang
	Neil	Wright
	Ling	Yang
	Xiaoming	Yang
National Co-ordinating Centre, Beijing	Yu	Guo
	Xiao	Han
	Can	Hou
	Jun	Lv
	Pei	Pei
	Chao	Liu
	Canqing	Yu
Qingdao CDC	Zengchang	Pang
	Ruqin	Gao
	Shanpeng	Li
	Shaojie	Wang
	Yongmei	Liu
	Ranran	Du
	Yajing	Zang
	Liang	Cheng
	Xiaocao	Tian
	Hua	Zhang
	Yaoming	Zhai
	Feng	Ning
	Xiaohui	Sun
	Feifei	Li
Licang CDC	Silu	Lv
	Junzheng	Wang
	Wei	Hou
Heilongjiang Provincial CDC	Mingyuan	Zeng
	Ge	Jiang
	Xue	Zhou
Nangang CDC	Liqiu	Yang
	Hui	He
	Bo	Yu
	Yanjie	Li
	Qinai	Xu
	Quan	Kang
	Ziyan	Guo
Hainan Provincial CDC	Dan	Wang
	Ximin	Hu
	Jinyan	Chen
	Yan	Fu
	Zhenwang	Fu
	Xiaohuan	Wang
Meilan CDC	Min	Weng
	Zhendong	Guo
	Shukuan	Wu
	Yilei	Li
	Huimei	Li
	Zhifang	Fu
Jiangsu Provincial CDC	Ming	Wu
	Yonglin	Zhou
	Jinyi	Zhou
	Ran	Tao
	Jie	Yang
	Jian	Su
Suzhou CDC	Fang	liu
	Jun	Zhang
	Yihe	Hu
	Yan	Lu
	Liangcai	Ma
	Aiyu	Tang
	Shuo	Zhang
	Jianrong	Jin
	Jingchao	Liu
Guangxi Provincial CDC	Zhenzhu	Tang
	Naying	Chen
	Ying	Huang
Liuzhou CDC	Mingqiang	Li
	Jinhuai	Meng
	Rong	Pan
	Qilian	Jiang
	Jian	Lan
	Yun	Liu
	Liuping	Wei
	Liyuan	Zhou
	Ningyu	Chen
	Ping	Wang
	Fanwen	Meng
	Yulu	Qin
	Sisi	Wang
Sichuan Provincial CDC	Xianping	Wu
	Ningmei	Zhang
	Xiaofang	Chen
	Weiwei	Zhou
Pengzhou CDC	Guojin	Luo
	Jianguo	Li
	Xiaofang	Chen
	Xunfu	Zhong
	Jiaqiu	Liu
	Qiang	Sun
Gansu Provincial CDC	Pengfei	Ge
	Xiaolan	Ren
	Caixia	Dong
Maiji CDC	Hui	Zhang
	Enke	Mao
	Xiaoping	Wang
	Tao	Wang
	Xi	zhang
Henan Provincial CDC	Ding	Zhang
	Gang	Zhou
	Shixian	Feng
	Liang	Chang
	Lei	Fan
Huixian CDC	Yulian	Gao
	Tianyou	He
	Huarong	Sun
	Pan	He
	Chen	Hu
	Xukui	Zhang
	Huifang	Wu
	Pan	He
Zhejiang Provincial CDC	Min	Yu
	Ruying	Hu
	Hao	Wang
Tongxiang CDC	Yijian	Qian
	Chunmei	Wang
	Kaixu	Xie
	Lingli	Chen
	Yidan	Zhang
	Dongxia	Pan
	Qijun	Gu
Hunan Provincial CDC	Yuelong	Huang
	Biyun	Chen
	Li	Yin
	Huilin	Liu
	Zhongxi	Fu
	Qiaohua	Xu
Liuyang CDC	Xin	Xu
	Hao	Zhang
	Huajun	Long
	Xianzhi	Li
	Libo	Zhang
	Zhe	Qiu
